# Supplementary material for: Predictors of Permanent Pacemaker Implantation in Patients Undergoing Transcatheter Aortic Valve Replacement ‐ A Systematic Review and Meta‐Analysis
Source: PubMed Central journal article supplement — J Am Heart Assoc. 2021 Jul 14;10(14):e020906. doi: 10.1161/JAHA.121.020906 (PMC8483489; doi:10.1161/jaha.121.020906), 2021-07-14

# **Supplemental Material**

## Data S1.

### A. SEARCH STRATEGY and MAP:

(((((((((per-cutaneous aortic valve implantation AND cardiac pacemaker)) OR (per-cutaneous aortic valve implantation AND artificial pacemaker)) OR (per-cutaneous aortic valve implantation AND pacer)) OR (per-cutaneous aortic valve implantation AND pacemaker))) OR (((((g transcatheter aortic valve implantation AND cardiac pacemaker)) OR (g transcatheter aortic valve implantation AND artificial pacemaker)) OR (transcatheter aortic valve implantation AND pacer)) OR (g transcatheter aortic valve implantation AND pacemaker))) OR (((((tavr AND cardiac pacemaker)) OR (tavr AND artificial pacemaker)) OR (tavr AND pacer)) OR (tavr AND pacemaker))) OR (((((((per-cutaneous aortic valve replacement AND cardiac pacemaker)) OR (per-cutaneous aortic valve replacement AND artificial pacemaker)) OR (per-cutaneous aortic valve replacement AND pacer)) OR (per-cutaneous aortic valve replacement AND pacemaker))) OR (((((transcatheter aortic valve replacement AND cardiac pacemaker)) OR (transcatheter aortic valve replacement AND artificial pacemaker)) OR (transcatheter aortic valve replacement AND pacer)) OR (transcatheter aortic valve replacement AND pacemaker))) OR (((((tavr AND cardiac pacemaker)) OR (tavr AND artificial pacemaker)) OR (tavr AND pacer)) OR (tavr AND pacemaker)))

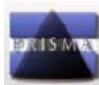

# PRISMA 2020 Checklist

## Data S2.

| Section and Topic             | Item # | Checklist item                                                                                                                                                                                                                                                                                       | Location where item is reported |
|-------------------------------|--------|------------------------------------------------------------------------------------------------------------------------------------------------------------------------------------------------------------------------------------------------------------------------------------------------------|---------------------------------|
| <b>TITLE</b>                  |        |                                                                                                                                                                                                                                                                                                      |                                 |
| Title                         | 1      | Identify the report as a systematic review.                                                                                                                                                                                                                                                          | Page 1                          |
| <b>ABSTRACT</b>               |        |                                                                                                                                                                                                                                                                                                      |                                 |
| Abstract                      | 2      | See the PRISMA 2020 for Abstracts checklist.                                                                                                                                                                                                                                                         | Page 2                          |
| <b>INTRODUCTION</b>           |        |                                                                                                                                                                                                                                                                                                      |                                 |
| Rationale                     | 3      | Describe the rationale for the review in the context of existing knowledge.                                                                                                                                                                                                                          | Page 3                          |
| Objectives                    | 4      | Provide an explicit statement of the objective(s) or question(s) the review addresses.                                                                                                                                                                                                               | Page 3                          |
| <b>METHODS</b>                |        |                                                                                                                                                                                                                                                                                                      |                                 |
| Eligibility criteria          | 5      | Specify the inclusion and exclusion criteria for the review and how studies were grouped for the syntheses.                                                                                                                                                                                          | Page 4                          |
| Information sources           | 6      | Specify all databases, registers, websites, organisations, reference lists and other sources searched or consulted to identify studies. Specify the date when each source was last searched or consulted.                                                                                            | Page 3                          |
| Search strategy               | 7      | Present the full search strategies for all databases, registers and websites, including any filters and limits used.                                                                                                                                                                                 | Page 3, Supplementarily page 3  |
| Selection process             | 8      | Specify the methods used to decide whether a study met the inclusion criteria of the review, including how many reviewers screened each record and each report retrieved, whether they worked independently, and if applicable, details of automation tools used in the process.                     | Page 4                          |
| Data collection process       | 9      | Specify the methods used to collect data from reports, including how many reviewers collected data from each report, whether they worked independently, any processes for obtaining or confirming data from study investigators, and if applicable, details of automation tools used in the process. | Page 4                          |
| Data items                    | 10a    | List and define all outcomes for which data were sought. Specify whether all results that were compatible with each outcome domain in each study were sought (e.g. for all measures, time points, analyses), and if not, the methods used to decide which results to collect.                        | Page 4                          |
|                               | 10b    | List and define all other variables for which data were sought (e.g. participant and intervention characteristics, funding sources). Describe any assumptions made about any missing or unclear information.                                                                                         | Page 4                          |
| Study risk of bias assessment | 11     | Specify the methods used to assess risk of bias in the included studies, including details of the tool(s) used, how many reviewers assessed each study and whether they worked independently, and if applicable, details of automation tools used in the process.                                    | Page 5,7                        |
| Effect measures               | 12     | Specify for each outcome the effect measure(s) (e.g. risk ratio, mean difference) used in the synthesis or presentation of results.                                                                                                                                                                  | Page 4                          |
| Synthesis methods             | 13a    | Describe the processes used to decide which studies were eligible for each synthesis (e.g. tabulating the study intervention characteristics and comparing against the planned groups for each synthesis (item #5)).                                                                                 | Page 5                          |
|                               | 13b    | Describe any methods required to prepare the data for presentation or synthesis, such as handling of missing summary statistics, or data conversions.                                                                                                                                                | Page 4-5                        |
|                               | 13c    | Describe any methods used to tabulate or visually display results of individual studies and syntheses.                                                                                                                                                                                               | Page 4-5                        |
|                               | 13d    | Describe any methods used to synthesize results and provide a rationale for the choice(s). If meta-analysis was performed, describe the model(s), method(s) to identify the presence and extent of statistical heterogeneity, and software package(s) used.                                          | Page 4-5                        |
|                               | 13e    | Describe any methods used to explore possible causes of heterogeneity among study results (e.g. subgroup analysis, meta-regression).                                                                                                                                                                 | Page 4,6,7                      |

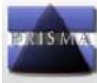

# PRISMA 2020 Checklist

|                                                |     |                                                                                                                                                                                                                                                                                      |                  |
|------------------------------------------------|-----|--------------------------------------------------------------------------------------------------------------------------------------------------------------------------------------------------------------------------------------------------------------------------------------|------------------|
|                                                | 13f | Describe any sensitivity analyses conducted to assess robustness of the synthesized results.                                                                                                                                                                                         | Page 7           |
| Reporting bias assessment                      | 14  | Describe any methods used to assess risk of bias due to missing results in a synthesis (arising from reporting biases).                                                                                                                                                              | Page 7           |
| Certainty assessment                           | 15  | Describe any methods used to assess certainty (or confidence) in the body of evidence for an outcome.                                                                                                                                                                                | Page 7           |
| <b>RESULTS</b>                                 |     |                                                                                                                                                                                                                                                                                      |                  |
| Study selection                                | 16a | Describe the results of the search and selection process, from the number of records identified in the search to the number of studies included in the review, ideally using a flow diagram.                                                                                         | Page 5           |
|                                                | 16b | Cite studies that might appear to meet the inclusion criteria, but which were excluded, and explain why they were excluded.                                                                                                                                                          | Page 5           |
| Study characteristics                          | 17  | Cite each included study and present its characteristics.                                                                                                                                                                                                                            | Page 5           |
| Risk of bias in studies                        | 18  | Present assessments of risk of bias for each included study.                                                                                                                                                                                                                         | Page 5, Figure 1 |
| Results of individual studies                  | 19  | For all outcomes, present, for each study: (a) summary statistics for each group (where appropriate) and (b) an effect estimate and its precision (e.g. confidence/credible interval), ideally using structured tables or plots.                                                     | S.Figure 1-21    |
| Results of syntheses                           | 20a | For each synthesis, briefly summarise the characteristics and risk of bias among contributing studies.                                                                                                                                                                               | S.Table 4        |
|                                                | 20b | Present results of all statistical syntheses conducted. If meta-analysis was done, present for each the summary estimate and its precision (e.g. confidence/credible interval) and measures of statistical heterogeneity. If comparing groups, describe the direction of the effect. | Page 6-7         |
|                                                | 20c | Present results of all investigations of possible causes of heterogeneity among study results.                                                                                                                                                                                       | Page 6-7         |
|                                                | 20d | Present results of all sensitivity analyses conducted to assess the robustness of the synthesized results.                                                                                                                                                                           | S.Table 11       |
| Reporting biases                               | 21  | Present assessments of risk of bias due to missing results (arising from reporting biases) for each synthesis assessed.                                                                                                                                                              | S.Figure 25      |
| Certainty of evidence                          | 22  | Present assessments of certainty (or confidence) in the body of evidence for each outcome assessed.                                                                                                                                                                                  | Page 6-7         |
| <b>DISCUSSION</b>                              |     |                                                                                                                                                                                                                                                                                      |                  |
| Discussion                                     | 23a | Provide a general interpretation of the results in the context of other evidence.                                                                                                                                                                                                    | Page 7,8,9       |
|                                                | 23b | Discuss any limitations of the evidence included in the review.                                                                                                                                                                                                                      | Page 9           |
|                                                | 23c | Discuss any limitations of the review processes used.                                                                                                                                                                                                                                | Page 10          |
|                                                | 23d | Discuss implications of the results for practice, policy, and future research.                                                                                                                                                                                                       | Page 9           |
| <b>OTHER INFORMATION</b>                       |     |                                                                                                                                                                                                                                                                                      |                  |
| Registration and protocol                      | 24a | Provide registration information for the review, including register name and registration number, or state that the review was not registered.                                                                                                                                       | NA               |
|                                                | 24b | Indicate where the review protocol can be accessed, or state that a protocol was not prepared.                                                                                                                                                                                       | NA               |
|                                                | 24c | Describe and explain any amendments to information provided at registration or in the protocol.                                                                                                                                                                                      | NA               |
| Support                                        | 25  | Describe sources of financial or non-financial support for the review, and the role of the funders or sponsors in the review.                                                                                                                                                        | Page 1           |
| Competing interests                            | 26  | Declare any competing interests of review authors.                                                                                                                                                                                                                                   | Page 1           |
| Availability of data, code and other materials | 27  | Report which of the following are publicly available and where they can be found: template data collection forms; data extracted from included studies; data used for all analyses; analytic code; any other materials used in the review.                                           | Page 1           |

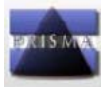

## PRISMA 2020 Checklist

*From:* Page MJ, McKenzie JE, Bossuyt PM, Boutron I, Hoffmann TC, Mulrow CD, et al. The PRISMA 2020 statement: an updated guideline for reporting systematic reviews. *BMJ* 2021;372:n71. doi: 10.1136/bmj.n71

For more information, visit: <http://www.prisma-statement.org/>

**Table S1: Inclusion criteria of the included RCTs**

| <b>Author/Study/Year/Ref</b>          | <b>Inclusion Criteria</b>                                                                                                                      | <b>MACCE Components</b>                                                                                               |
|---------------------------------------|------------------------------------------------------------------------------------------------------------------------------------------------|-----------------------------------------------------------------------------------------------------------------------|
| <b>Meduri (REPRISE III)<br/>2019</b>  | Symptomatic Aortic Stenosis and STS predicted risk of Mortality >8%.                                                                           | Cardiovascular Mortality, MI, Stroke, Conduction abnormality requiring new-pacemaker placement, Paravalvular leakage. |
| <b>Thiele (SOLVE-TAVI)<br/>2020</b>   | Symptomatic Aortic Stenosis, Age >75 years and high predicted surgical risk of Mortality defined as Logistic Euroscore >20% or STS score >10%. | Cardiovascular Mortality, MI, Stroke, Conduction abnormality requiring new-pacemaker placement, Paravalvular leakage. |
| <b>Reardon (REPRISE III)<br/>2019</b> | Severe Native Aortic stenosis, and STS predicted risk of Mortality >8%                                                                         | Cardiovascular Mortality, MI, Stroke, Conduction abnormality requiring new-pacemaker placement, Paravalvular leakage. |

**Table S2: Randomized studies quality assessment using the Oxford Quality Scoring System.  
(Jadad score  $\geq$  3 considered high quality)**

| <b>Author/Study/Year/Ref</b>      | <b>Rating Scale List</b>                            | <b>Jadad Score</b> |
|-----------------------------------|-----------------------------------------------------|--------------------|
| <b>Meduri (REPRISE III) 2019</b>  | Was the study described as random                   | Yes                |
|                                   | Was the randomization described and appropriate     | Yes                |
|                                   | Was the study described as double-blind             | No                 |
|                                   | Was the method of double-blinding appropriate       | No                 |
|                                   | Was there a description of dropouts and withdrawals | Yes                |
| <b>Thiele (SOLVE-TAVI) 2020</b>   | Was the study described as random                   | Yes                |
|                                   | Was the randomization described and appropriate     | Yes                |
|                                   | Was the study described as double-blind             | No                 |
|                                   | Was the method of double-blinding appropriate       | No                 |
|                                   | Was there a description of dropouts and withdrawals | Yes                |
| <b>Reardon (REPRISE III) 2019</b> | Was the study described as random                   | Yes                |
|                                   | Was the randomization described and appropriate     | Yes                |
|                                   | Was the study described as double-blind             | No                 |
|                                   | Was the method of double-blinding appropriate       | No                 |
|                                   | Was there a description of dropouts and withdrawals | Yes                |

**Table S3: Quality Assessment of the included observational studies**

| Author/Study       | Year | Representativeness of the exposed | Selection of the non exposed cohort | Ascertainment of exposure | Outcome not present at baseline | Comparability of the cohort | Assessment of outcome | Enough follow-up duration | Adequate follow-up | Total score |
|--------------------|------|-----------------------------------|-------------------------------------|---------------------------|---------------------------------|-----------------------------|-----------------------|---------------------------|--------------------|-------------|
| Hamandi            | 2020 | *                                 | *                                   | *                         | *                               | *                           | *                     | *                         | *                  | 8           |
| Kochman            | 2020 | *                                 | *                                   | *                         | *                               | *                           | *                     | *                         | *                  | 8           |
| Sharma             | 2020 | *                                 | *                                   | *                         | *                               | **                          | *                     | *                         | *                  | 9           |
| Ay                 | 2019 | *                                 | *                                   | *                         | *                               | **                          | *                     | *                         | *                  | 9           |
| Giordano           | 2019 | *                                 | *                                   | *                         | *                               | **                          | *                     | *                         | *                  | 9           |
| Kaneko             | 2019 | *                                 | *                                   | *                         | *                               | **                          | *                     | *                         | *                  | 9           |
| Karacop            | 2019 | *                                 | *                                   | *                         | *                               | **                          | *                     | *                         | *                  | 9           |
| Ball               | 2018 | *                                 | *                                   | *                         | *                               | **                          | *                     | *                         | *                  | 9           |
| Bhardwaj           | 2018 | *                                 | *                                   | *                         | *                               | **                          | *                     | *                         | *                  | 9           |
| Doshi              | 2018 | *                                 | *                                   | *                         | *                               | *                           | *                     | *                         | *                  | 8           |
| Eitan              | 2018 | *                                 | *                                   | *                         | *                               | *                           | *                     | *                         | *                  | 8           |
| Finkelstein        | 2018 | *                                 | *                                   | *                         | *                               | *                           | *                     | *                         | *                  | 8           |
| Gonska             | 2018 | *                                 | *                                   | *                         | *                               | **                          | *                     | *                         | *                  | 9           |
| Yousif             | 2018 | *                                 | *                                   | *                         | *                               | **                          | *                     | *                         | *                  | 9           |
| Enriquez-Rodriguez | 2017 | *                                 | *                                   | *                         | *                               | *                           | *                     | *                         | *                  | 8           |
| Monteiro           | 2017 | *                                 | *                                   | *                         | *                               | **                          | *                     | *                         | *                  | 9           |
| Rogers             | 2017 | *                                 | *                                   | *                         | *                               | *                           | *                     | *                         | *                  | 8           |
| Soliman            | 2017 | *                                 | *                                   | *                         | *                               | **                          | *                     | *                         | *                  | 9           |
| Van Mourik         | 2017 | *                                 | *                                   | *                         | *                               | *                           | *                     | *                         | *                  | 8           |
| Ben-Shoshan        | 2016 | *                                 | *                                   | *                         | *                               | *                           | *                     | *                         | *                  | 8           |
| Kahraman           | 2016 | *                                 | *                                   | *                         | *                               | **                          | *                     | *                         | *                  | 9           |
| Kley               | 2016 | *                                 | *                                   | *                         | *                               | *                           | *                     | *                         | *                  | 8           |
| Ramkumar           | 2016 | *                                 | *                                   | *                         | *                               | *                           | *                     | *                         | *                  | 8           |
| Sawaya             | 2016 | *                                 | *                                   | *                         | *                               | *                           | *                     | *                         | *                  | 8           |
| Zaman              | 2016 | *                                 | *                                   | *                         | *                               | **                          | *                     | *                         | *                  | 9           |
| Gauthier           | 2015 | *                                 | *                                   | *                         | *                               | **                          | *                     | *                         | *                  | 9           |
| Rouge              | 2015 | *                                 | *                                   | *                         | *                               | *                           | *                     | *                         | *                  | 8           |
| Boerlage-Van Dijk  | 2014 | *                                 | *                                   | *                         | *                               | **                          | *                     | *                         | *                  | 9           |
| Simms              | 2013 | *                                 | *                                   | *                         | *                               | **                          | *                     | *                         | *                  | 9           |
| Akin               | 2012 | *                                 | *                                   | *                         | *                               | **                          | *                     | *                         | *                  | 9           |
| Bagur              | 2012 | *                                 | *                                   | *                         | *                               | **                          | *                     | *                         | *                  | 9           |
| De Carlo           | 2012 | *                                 | *                                   | *                         | *                               | **                          | *                     | *                         | *                  | 9           |
| Gilard             | 2012 | *                                 | *                                   | *                         | *                               | *                           | *                     | *                         | *                  | 8           |
| Ledwoch            | 2012 | *                                 | *                                   | *                         | *                               | *                           | *                     | *                         | *                  | 8           |
| Mouillet           | 2012 | *                                 | *                                   | *                         | *                               | **                          | *                     | *                         | *                  | 9           |
| Muniz-Garcia       | 2012 | *                                 | *                                   | *                         | *                               | **                          | *                     | *                         | *                  | 9           |
| Nuis               | 2012 | *                                 | *                                   | *                         | *                               | **                          | *                     | *                         | *                  | 9           |
| Pulse              | 2012 | *                                 | *                                   | *                         | *                               | *                           | *                     | *                         | *                  | 8           |
| Saia               | 2012 | *                                 | *                                   | *                         | *                               | **                          | *                     | *                         | *                  | 9           |
| Salinas            | 2012 | *                                 | *                                   | *                         | *                               | **                          | *                     | *                         | *                  | 9           |
| Schroeter          | 2012 | *                                 | *                                   | *                         | *                               | **                          | *                     | *                         | *                  | 9           |
| Van der Boon       | 2012 | *                                 | *                                   | *                         | *                               | **                          | *                     | *                         | *                  | 9           |
| Bosmans            | 2011 | *                                 | *                                   | *                         | *                               | *                           | *                     | *                         | *                  | 7           |
| Calvi              | 2011 | *                                 | *                                   | *                         | *                               | *                           | *                     | *                         | *                  | 8           |
| Chorianopoulos     | 2011 | *                                 | *                                   | *                         | *                               | **                          | *                     | *                         | *                  | 9           |
| D'Ancona           | 2011 | *                                 | *                                   | *                         | *                               | **                          | *                     | *                         | *                  | 9           |
| Ewe                | 2011 | *                                 | *                                   | *                         | *                               | *                           | *                     | *                         | *                  | 8           |
| Fraccaro           | 2011 | *                                 | *                                   | *                         | *                               | **                          | *                     | *                         | *                  | 9           |
| Guetta             | 2011 | *                                 | *                                   | *                         | *                               | **                          | *                     | *                         | *                  | 9           |
| Khawaja            | 2011 | *                                 | *                                   | *                         | *                               | **                          | *                     | *                         | *                  | 9           |



|              |      |   |   |   |   |    |   |   |   |   |
|--------------|------|---|---|---|---|----|---|---|---|---|
| Pilgrim      | 2011 | * | * | * | * | *  | * | * | * | 8 |
| Baan         | 2010 | * | * | * | * | ** | * | * | * | 9 |
| Bleiziffer   | 2010 | * | * | * | * | ** | * | * | * | 8 |
| Eltchnainoff | 2010 | * | * | * | * | ** | * | * | * | 9 |
| Erkopic      | 2010 | * | * | * | * | ** | * | * | * | 9 |
| Ewe          | 2010 | * | * | * | * | ** | * | * | * | 9 |
| Ferriera     | 2010 | * | * | * | * | ** | * | * | * | 9 |
| Godino       | 2010 | * | * | * | * | *  | * | * | * | 8 |
| Haworth      | 2010 | * | * | * | * | ** | * | * | * | 9 |
| Lefevre      | 2010 | * | * | * | * | *  | * | * | * | 8 |
| Piazza       | 2010 | * | * | * | * | *  | * | * | * | 8 |
| Rodes-Cabau  | 2010 | * | * | * | * | ** | * | * | * | 9 |
| Roten        | 2010 | * | * | * | * | ** | * | * | * | 9 |
| Thielmann    | 2009 | * | * | * | * | ** | * | * | * | 9 |
| Aslan        | 2020 | * | * | * | * | ** | * | * | * | 9 |
| Hamdan       | 2015 | * | * | * | * | ** | * | * | * | 9 |
| Jilaihawi    | 2019 | * | * | * | * | ** | * | * | * | 9 |
| Matsushita   | 2020 | * | * | * | * |    | * | * | * | 7 |
| Tretter      | 2019 | * | * | * | * | ** | * | * | * | 9 |
| Zaid         | 2020 | * | * | * | * | ** | * | * | * | 9 |
| Ahmad        | 2019 | * | * | * | * |    | * | * | * | 7 |

The methodological quality of retrospective or prospective observational studies was done using Newcastle–Ottawa scale (NOS) quality scale. Each asterisk/star in the Newcastle-Ottawa Scaling System (NOS) represents responses of the biases questionnaire. Each bias assessment part gets one star except comparability that gets a maximum of 2 stars. Each star counts towards the total score. Score <5 represents poor quality, 5-6 represents moderate quality and 7 to 9 are considered as high quality. Total of 30 studies had a NOS score >7 representing a high quality. Rest of the studies had moderate to poor quality owing to the ascertainment bias, comparability, and follow up limitations.

- Not Available or unable to extract

**Table S4: The demographics of the population in all the included studies**

| Author      | Year | Study | Country               | Period     | F U | Size | PPM  | PPM % | Mean age   | Male | EuroSCORE | STS     | Valve type                                |
|-------------|------|-------|-----------------------|------------|-----|------|------|-------|------------|------|-----------|---------|-------------------------------------------|
| Hamandi     | 2020 | OCS   | US                    | 2012- 2016 | 12  | 424  | 110  | 25.9  | 82         | 52.9 |           |         | Sapien, CoreValve, Evolut                 |
| Sharma      | 2020 | OCS   | US                    | 2012-2016  | 1   | 226  | 25   | 11.1  | 81±7       | 50.4 |           |         | Edwards Sapien                            |
| Thiele      | 2020 | RCT   | Germany               | 2016-2018  |     | 438  | 90   | 20.6  | 81.7 ± 5   | 48.9 | 4.10      | 4.90    | Evolut R vs Sapien 3                      |
| Kochman     | 2020 | OCS   | Poland                | 2015-2016  | 24  | 24   | 6    | 30    | 75.3±7     | 50.0 |           |         | lotus                                     |
| Meduri      | 2019 | RCT   | US, Brazil, Australia | 2014-2015  | 12  | 704  | 245  | 26.9  | 82±8       | 49.0 | 6.5± 5.7  |         | LOTUS and CoreValve                       |
| Karacop     | 2019 | OCS   | Turkey                | 2013-2018  | 3   | 150  | 49   | 32.7  | 81±8       | 72.7 | 20.9±3.   |         | CoreValve                                 |
| Ay          | 2019 | OCS   | Turkey                | 2012-2017  | 27  | 274  | 25   | 9.1   | 78         | 37.2 | 20.85     |         | ESV XR, Corevalve, Lotus                  |
| Kaneko      | 2019 | OCS.  | Germany               | 2015-2017  |     | 92   | 17   | 18.5  | 82±7       | 32.6 | 17±13     |         | Evolut R                                  |
| Reardon     | 2019 | RCT   | US,Europe,Australia   | 2014-2018  | 2   | 912  | 263  | 28.8  | 82.8       | 49.0 |           | 6.70    | Corevalve vs Lotus                        |
| Giordan]    | 2019 | OCS   | Italy                 | 2012-2018  | 1   | 1976 | 284  | 14.4  | 83.5       | 42.3 | 16.13     | 5.56    | lotus, ESV, portico evolut,accurate, evol |
| Doshi       | 2018 | OCS   | US                    | 2012-2014  | 12  | 8210 | 1949 | 23    | 81±8       | 52.3 |           |         | Not mentioned                             |
| Bhardwaj    | 2018 | OCS   | US                    | 2012-2016  | 12  | 383  | 44   | 11.5  | 83±8       | 50.9 |           |         | Edward Sapien and CoreValve               |
| Gonska      | 2018 | OCS   | Germany               | 2014-2016  | 12  | 612  | 168  | 27.5  | 80±6       | 47.1 |           |         | Corevalve,ESV and Lotus Edge              |
| Yousif      | 2018 | OCS   | Switzerland           | 2008-2014  | 12  | 546  | 103  | 18.9  | 81.35      | 48.5 | 21.4±15   | 6.60    | Corevalce, ESV,Symetis, Ventor            |
| Ball        | 2018 | OCS   | US                    | 2012-2015  |     | 209  | 44   | 21.1  |            | 56.5 |           |         | ESV, Lotus, CoreValve, Evolut             |
| Eitan       | 2018 | OCS   | Germany               | 2014-2017  |     | 92   | 18   | 23    | 82.4       | 93.5 | 21.04     | 4.50    | ESV & core valve                          |
| Finkelstei  | 2018 | OCS   | Israel                | 2012-2016  |     | 735  | 122  | 16.6  | 81         | 44.6 |           | 3.40    | ESV corevalve                             |
| Monteiro    | 2017 | OCS   | Brazil                | 2008-2015  | 1   | 670  | 135  | 20.2  | 82±7       | 47.9 | 20.2±15   |         | CoreValve and Sapien XT                   |
| Enriquez-R  | 2017 | OCS   | Spain                 |            | 1   | 144  | 18   | 12.5  | 83 ± 6     | 47.9 |           | 6 ± 5   | sapien corevalve                          |
| Rogers      | 2017 | OCS   | US                    | 2013-2016  |     | 257  | 17   | 6.6   | 82 ± 8     | 49.4 |           | 6.96    | sapien corevalve                          |
| Soliman     | 2017 | OCS   | Egypt                 | 2013-2016  | 6   | 40   | 5    | 12.5  | 73.98± 8.  | 52.5 |           |         | sapien medtronic                          |
| vanMourik   | 2017 | OCS   | Netherland            | 2010-2013  | 36  | 114  | 5    | 4.4   | 79.6±8.7   | 32.5 | 17.8±11   | 6.7± 5. | sapien                                    |
| Kley        | 2016 | OCS   | Nehterland            | 2007-2013  | 12  | 240  | 25   | 10.4  | 81         | 0.0  | 23.2±14   |         | Edward Sapien XT, Corevalve               |
| Zaman       | 2016 | OCS   | Australia             | 2012-2015  |     | 95   | 27   | 27.4  | 83 ± 6     | 44.5 |           | 7.3± 8  | Lotus                                     |
| Kahraman    | 2016 | OCS   | Turkey                | 2012-2014  | 6   | 136  | 6    | 4.4   | 79.4       | 38.2 | 21.15     |         | NA                                        |
| Sawaya      | 2016 | OCS   | France                | 2010-2015  | 12  | 790  | 87   | 11    | 82.8 ± 7.1 | 47.9 | 17.70     | 6.0     | sapien                                    |
| Ben-Shoshan | 2016 | OCS   | Israel                | 2014-2016  | 1   | 232  | 48   | 24.5  | 82.3 ± 6.1 | 46.1 | 5.3 ± 5.0 | 4.1     | ESV, Medtronic                            |
| Ramkumar    | 2016 | OCS   | australia             | 2012-2015  | 1   | 104  | 25   | 24    |            | 46.2 |           |         | lotus                                     |
| Rouge       | 2015 | OCS   | France                | 2009-2015  | 6   | 150  | 18   | 12    | 82.6       | 45.3 | 21.67     | 9.65    | ESV and Medtronic                         |
| Gauthier    | 2015 | OCS   |                       | 2009-2013  |     | 176  | 13   | 7.4   | 85         | 51.7 | 25.28     |         | ESV, core valve and portico               |
| Boerlage    | 2014 | OCS   | Netherland            | 2007-2011  | 12  | 121  | 23   | 19    | 80.5 ± 7.8 | 38.1 | 19.2 ± 12 | 4.5 ± 2 | Corevalve                                 |
| Simms       | 2013 | OCS   | UK                    | 2008-2010  | 12  | 100  | 17   | 17    | 81±6       | 48.0 |           |         | Medtronic CoreValve                       |
| Nuis        | 2012 | OCS   | Columbia, Nether      | 2005-2011  | 1   | 235  | 48   | 20.4  | 80±7       | 48.9 | 19.1±13   | 6.1± 5  | medtronic                                 |
| Pulse       | 2012 | OCS   | Germany               | 2008-2010  | 12  | 180  | 9    | 5     | 82.1 ± 5.4 | 30.0 | 27 ± 14   |         | medtronic and sapien                      |
| Ledwoch     | 2012 | OCS   | Germany               | 2009- 2010 | 1   | 1147 | 386  | 33.7  | 82±6       | 40.8 | 20±13     |         | Medtronic and sapien                      |
| Akin        | 2012 | OCS   | Germany               | 2007- 2008 | 0.2 | 45   | 23   | 51.1  | 81±6       | 40.0 | 21±16     |         | Medtronic CoreValve                       |
| Bagur       | 2012 | OCS   | Canada                | 2005- 2010 | 1   | 411  | 30   | 7.3   | 81±11      | 42.8 | 26±17     | 9±6     | Edward SAPIEN                             |
| De Carlo    | 2012 | OCS   | Italy                 | 2007- 2010 | 12  | 275  | 66   | 24    | 82±6       | 46.6 | 23±14     |         | Medtronic CoreValve                       |

|                       |      |     |                     |            |     |      |     |      |            |      |            |            |                                                         |
|-----------------------|------|-----|---------------------|------------|-----|------|-----|------|------------|------|------------|------------|---------------------------------------------------------|
| <b>Gilard</b>         | 2012 | OCS | France              | 2010- 2011 | 3.8 | 3195 | 497 | 15.6 | 83±7       | 51.0 | 22±14      | 14±12      | CoreValve and ESV                                       |
| <b>Muniz-Garcia</b>   | 2012 | OCS | Spain               | 2008- 2011 |     | 174  | 48  | 27.6 | 79±7       | 37.4 | 19±10      | 7±5        | Medtronic CoreValve                                     |
| <b>Saia</b>           | 2012 | OCS | Italy               | 2008- 2010 | 12  | 60   | 17  | 28.3 | 82±6       | 43.3 | 23±13      | 9±7        | Medtronic CoreValve                                     |
| <b>Salinas</b>        | 2012 | OCS | Spain               |            | 12  | 34   | 3   | 8.8  | 84         | 38.2 | 23.00      |            | Edward SAPIEN                                           |
| <b>Schroeter</b>      | 2012 | OCS | Germany             | 2008-2009  |     | 88   | 32  | 36.4 | 80±6       |      | 23±12      |            | Medtronic CoreValve                                     |
| <b>van der Boon</b>   | 2012 | OCS | Netherlands         | 2005- 2011 | 12  | 167  | 36  | 21.6 | 81±7       | 46.0 | 13.00      |            | Medtronic CoreValve                                     |
| <b>Mouillet</b>       | 2012 | OCS | France              | 2007-2011  | 10  | 79   | 21  | 26.6 | 82±17      | 31.0 | 23±10      |            | Medtronic CoreValve                                     |
| <b>Liang</b>          | 2012 | OCS | New Zealand         | 2008-2011  | 21  | 53   | 5   | 9.4  | 80±7       | 56.6 | 26±16      | 6±3        | CoreValve and ESV                                       |
| <b>Pilgrim</b>        | 2011 | OCS | Switzerland         | 2007-2010  | 12  | 256  | 60  | 23.4 | 82.3 ± 6.2 | 56.3 | 40.6±16    | 6.2± 5.0   | Medtronic and ESV                                       |
| <b>Bosmans</b>        | 2011 | OCS | Belgium             | 2010       | 12  | 328  | 40  | 12.2 | 83±6       | 46.0 | 28±16      |            | CoreValve and ESV                                       |
| <b>D'Ancona</b>       | 2011 | OCS | Germany             | 2008- 2011 | 12  | 322  | 20  | 6.2  | 82±6       | 33.2 | 39±22      | 18±10      | Edward SAPIEN                                           |
| <b>Ewe</b>            | 2011 | OCS | Netherlands         |            | 29  | 104  | 4   | 3.8  | 80.6±7.9   | 50.0 | 21±12      | 8.7± 3.6   | Edward SAPIEN                                           |
| <b>Fraccaro</b>       | 2011 | OCS | Italy               | 2007- 2009 | 6   | 64   | 25  | 39.1 | 81±7       | 45.0 | 24±15      |            | Medtronic CoreValve                                     |
| <b>Guetta</b>         | 2011 | OCS | Israel              | 2008-2010  | 3   | 70   | 28  | 40   | 83±5       | 37.0 |            |            | Medtronic CoreValve                                     |
| <b>Khawaja</b>        | 2011 | OCS | UK                  | 2007-2009  |     | 243  | 81  | 33.3 | 81±7       | 50.6 |            |            | Medtronic CoreValve                                     |
| <b>Calvi</b>          | 2011 | OCS | Italy               | 2007- 2011 | 12  | 162  | 52  | 32.1 | 81±5       | 39.5 | 28±15      |            | Medtronic CoreValve                                     |
| <b>Chorianopoulos</b> | 2011 | OCS | Germany             | 2009- 2011 | 1   | 130  | 46  | 35.4 | 81±6       | 41.5 | 24±13.1    |            | Medtronic CoreValve                                     |
| <b>Hayashida</b>      | 2011 | OCS | France              | 2006-2010  | 7   | 260  | 17  | 6.5  | 83.1±6.3   | 49.6 | 24.3±11.4  |            | CoreValve and ESV                                       |
| <b>Bleiziffer</b>     | 2010 | OCS | Germany             | 2007- 2009 | 0.5 | 159  | 35  | 22   | 80.8±6.2   | 43.0 | 21.6±13    |            | CoreValve and ESV                                       |
| <b>Eltchnainoff</b>   | 2010 | OCS | France              | 2009- 2009 | 1   | 244  | 29  | 11.9 | 82.3±7.3   | 56.6 | 25.6±1.14  | 18.9 ±12.8 | CoreValve and ESV                                       |
| <b>Baan</b>           | 2010 | OCS | Netherland          |            | 1   | 34   | 7   | 0.2  | 80±8       | 53.0 |            | 5±3        | Medtronic CoreValve                                     |
| <b>Ewe</b>            | 2010 | OCS | Nether, Sing, Italy |            | 12  | 147  | 7   | 4.8  | 80±7       | 42.9 | 21.8±11    |            | Edward SAPIEN                                           |
| <b>Ferriera</b>       | 2010 | OCS | Portugal            | 2007- 2009 |     | 32   | 8   | 25   | 81         | 34.0 | 23.9± 14.9 |            | Medtronic CoreValve                                     |
| <b>Godino</b>         | 2010 | OCS | Italy               | 2007- 2010 | 6   | 137  | 23  | 0.16 |            | 53.3 |            |            | CoreValve and ESV                                       |
| <b>Erkaptic</b>       | 2010 | OCS | Germany             | 2008- 2009 | 0.4 | 50   | 17  | 34   | 80±6       | 46.0 | 20 ± 15    |            | CoreValve and ESV                                       |
| <b>Haworth</b>        | 2010 | OCS | UK                  | 2007-2008  | 5   | 33   | 8   | 24   | 81.5±6.7   | 57.0 | 24±15      |            | Medtronic CoreValve                                     |
| <b>Piazza</b>         | 2010 | OCS | Netherlands         | 2005- 2009 | 6   | 91   | 17  | 18.7 | 81±7       | 42.9 | 16±9       |            | Medtronic CoreValve                                     |
| <b>Rodes-Cabau</b>    | 2010 | OCS | Canada              | 2005-2009  | 8   | 339  | 17  | 5    | 81±8       | 44.8 |            | 9.8± 6.4   | Edward SAPIEN                                           |
| <b>Roten</b>          | 2010 | OCS | Switzerland         | 2007-2008  | 2.6 | 67   | 23  | 34.3 | 83         | 46.0 | 23.00      | 6.00       | CoreValve and ESV                                       |
| <b>Lefevre</b>        | 2010 | OCS | Europe              | 2007- 2008 | 12  | 130  | 3   | 2.3  | 82.1±5.5   | 44.6 | 30±13.7    | 11.6 ±6.5  | Edward SAPIEN                                           |
| <b>Attias</b>         | 2010 | OCS | France              | 2006-2009  | 1   | 83   | 7   | 8.4  | 81±9       | 53.0 | 26±14      | 15±8       | CoreValve and ESV                                       |
| <b>Petronio</b>       | 2010 | OCS | Italy               | 2007-2009  | 6   | 514  | 84  | 16.3 | 83         | 44.0 | 20.1       |            | Medtronic CoreValve                                     |
| <b>Thielmann</b>      | 2009 | OCS | Germany             | 2005- 2008 | 12  | 39   | 4   | 10.3 | 81 ± 5     | 38.0 | 44.2 ±12.6 | 17.9 ±6    | Edward SAPIEN                                           |
| <b>Aslan</b>          | 2020 | OCS | Turkey              | 2017-2020  |     | 140  | 24  | 17   | 78.8       | 36.4 |            |            | Edward SAPIEN XT, Medtronic Corevalve evolut            |
| <b>Hamdan</b>         | 2015 | OCS | Israel              | 2015       |     | 73   | 21  | 29   | 79.8±6     | 45.0 |            |            | CoreValve, Engager                                      |
| <b>Jilaihawi</b>      | 2019 | OCS | US                  | 2016-2018  | 1   | 248  | 24  | 9.6  | 83.2±6     | 57.3 |            | 6.0± 2.9   | Evolut R, Evolut Pro, XL                                |
| <b>Matsushita</b>     | 2020 | OCS | France              | 2014-2018  | 3   | 242  | 114 | 47   |            | 38.4 |            |            | Sapien 3, Evolut R                                      |
| <b>Tretter</b>        | 2019 | OCS | US                  | 2013-2017  | 6   | 200  | 41  | 20.5 | 81±7.7     | 49.0 |            | 4.7± 2.8   | Sapien XT, Sapien 3, LOTUS, CoreValve, Evolut R, Evolut |
| <b>Zaid</b>           | 2020 | OCS | US                  | 2015-2019  | 1   | 532  | 57  | 10.7 | 80.7±8     | 57.9 |            | 5.5        | Sapien 3                                                |

---

|              |      |     |    |      |   |     |    |     |        |      |     |               |
|--------------|------|-----|----|------|---|-----|----|-----|--------|------|-----|---------------|
| <b>Ahmad</b> | 2019 | OCS | US | 2019 | 1 | 269 | 17 | 6.3 | 79.7±8 | 50.6 | 6.2 | Edward Sapien |
|--------------|------|-----|----|------|---|-----|----|-----|--------|------|-----|---------------|

---

Excluded patients with prophylactic PPM: Hamandi (126), De Carlo (32); Excluded patients with prior PPM: Kochman (4), Eitan (14), Ben-Shoshan 36, Meduri (160), Sharma (36), Doshi (62), D'Ancona (36), Chorianopoulos (32); OCS: Observational Cohort Study, RCT: Randomized Controlled Trial, FU: Follow up in years, STS: Society of Thoracic Surgeons Score

**Table S5: The baseline comorbidities of the population in all the included studies (all numbers indicate percentages).**

| Author      | AF | LBBB | RBBB | EF | Sm | DM | HTN | HLD | CKD | CVA | Ob | LC | PAD | MI | PCI | CABG | CAD        | COPD |
|-------------|----|------|------|----|----|----|-----|-----|-----|-----|----|----|-----|----|-----|------|------------|------|
| Hamandi     |    | 9    |      |    |    |    |     |     |     |     |    |    |     |    |     |      |            |      |
| Sharma      |    | 10   | 12   |    |    | 36 | 90  |     |     |     |    |    | 15  |    | 35  | 33   | 78         | 18   |
| Thiele      | 45 |      |      |    | 4  | 38 | 91  | 41  | 82  | 12  |    |    | 13  | 9  | 37  | 1    | 56         | 14   |
| Kochman     | 25 |      |      |    |    | 21 | 67  |     |     | 13  |    |    | 17  | 17 | 4   | 8    | 54         | 29   |
| Meduri      | 29 | 8    | 12   |    |    | 31 | 92  |     |     | 13  |    | 1  | 28  | 17 | 31  | 24   | 71         | 17   |
| Karacop     |    |      |      | 52 | 34 | 35 | 79  | 16  |     | 62  |    |    | 5   |    |     |      | 45         | 22   |
| Ay          | 32 |      |      | 50 |    | 29 | 62  | 17  |     |     |    |    | 22  | 5  |     | 12   | 54         | 34   |
| Kaneko      | 34 | 8    | 10   |    |    | 67 | 77  | 32  | 49  |     |    |    |     | 11 |     |      |            |      |
| Reardon     | 34 |      |      | 56 |    |    |     |     |     | 12  |    |    |     |    |     |      |            |      |
| Giordano    |    |      |      |    |    |    |     |     |     |     |    |    |     |    |     |      |            |      |
| Doshi       | 44 | 9    | 3    |    |    | 28 | 79  |     | 37  |     | 14 | 2  |     |    | 3   | 1    | 7          |      |
| Bhardwaj    | 43 | 10   | 13   |    | 3  | 36 | 94  |     |     |     |    |    | 41  | 19 | 20  | 33   |            |      |
| Gonska      | 36 |      |      | 20 |    | 30 |     |     | 10  | 10  |    |    |     | 14 |     | 10   | 61         | 44   |
| Yousif      |    |      |      |    |    | 24 | 74  | 38  |     |     |    |    |     |    |     |      | 55         |      |
| Ball        | 32 | 10   | 11   |    |    | 39 | 91  |     |     |     |    |    |     |    |     |      | 97         |      |
| Eitan       | 47 | 14   |      |    |    | 28 | 87  | 65  |     | 11  |    |    | 27  | 73 | 37  | 26   | 73         | 22   |
| Finkelstei  | 29 |      |      |    | 6  | 4  | 85  | 71  | 64  | 17  | 66 |    | 10  | 51 |     |      |            | 9    |
| Monteiro    | 14 | 14   | 11   |    |    | 32 | 75  | 49  | 76  | 7   |    |    | 17  | 14 | 34  | 15   | 11.6<br>?? | 19   |
| Enriquez-R  | 34 |      |      |    |    | 37 | 80  | 46  | 19  |     |    |    | 7   | 22 |     |      |            | 15   |
| Rogers      | 38 |      |      |    |    | 33 | 88  | 86  | 31  | 7   |    |    | 20  | 60 | 25  | 22   |            | 36   |
| Soliman     |    |      |      |    | 35 | 53 | 65  |     | 15  | 10  |    |    | 35  | 15 | 23  | 23   |            | 30   |
| vanMourik   | 25 |      |      |    |    | 26 | 65  | 36  | 33  | 6   |    | 1  | 14  | 13 | 25  | 10   | 42         |      |
| Kley        | 18 |      |      | 52 |    | 29 | 75  |     | 22  |     |    |    | 50  |    |     |      | 63         | 31   |
| Zaman       | 28 | 8    | 7    |    |    | 23 | 75  |     |     | 14  |    |    |     | 12 |     |      |            | 24   |
| Kahraman    | 21 |      |      |    |    | 30 | 70  | 15  |     |     |    |    | 24  | 4  |     | 13   | 65         |      |
| Sawaya      | 27 | 2    | 4    | 54 | 3  | 25 | 64  | 46  | 2   | 8   |    |    | 25  |    | 25  | 10   |            | 18   |
| Ben-Shoshan | 32 |      |      | 56 | 23 | 40 | 88  | 76  |     |     |    |    |     | 16 |     | 14   | 56         | 10   |
| Ramkumar    | 32 |      |      |    |    | 23 | 76  |     |     | 15  |    |    | 10  |    |     | 17   | 20         | 24   |
| Rouge       |    |      |      |    | 31 | 28 | 59  |     |     | 13  |    |    | 17  | 11 | 29  | 19   | 47         | 16   |
| Gauthier    |    |      |      |    |    | 20 |     |     |     | 20  |    |    |     | 72 |     |      | 72         | 30   |
| Boerlage    | 31 | 12   | 12   |    |    | 28 | 50  | 12  |     |     |    |    |     |    | 30  | 12   | 51         | 36   |
| Simms       | 29 |      |      |    |    | 28 | 23  |     | 19  |     |    |    |     |    |     |      | 61         | 21   |
| Nuis        | 21 |      |      |    |    | 24 | 56  |     | 5   |     |    |    | 13  | 19 | 26  | 23   |            | 30   |
| Pulse       |    | 7    |      |    |    | 36 |     |     | 61  | 12  |    |    | 31  |    | 28  | 15   | 67         | 32   |
| Ledwoch     | 24 |      |      |    |    | 34 | 65  |     | 6   | 8   |    |    | 31  | 14 | 34  | 17   |            | 25   |
| Akin        | 16 | 2    | 4    |    | 27 | 38 | 91  |     |     | 29  |    |    | 13  |    |     | 7    | 78         | 18   |
| Bagur       | 23 | 8    | 5    | 54 |    | 29 | 79  |     | 60  | 24  |    |    | 30  | 45 | 42  | 33   |            | 28   |

|                |    |    |    |    |    |    |    |    |    |    |    |     |    |    |          |
|----------------|----|----|----|----|----|----|----|----|----|----|----|-----|----|----|----------|
| De Carlo       |    | 14 | 12 | 52 |    |    |    |    |    |    |    |     |    |    |          |
| Gilard         | 26 |    |    | 53 |    |    |    | 10 |    | 21 | 16 |     | 18 | 48 | 25       |
| Muniz-Garcia   | 32 | 17 | 17 |    |    | 37 | 76 | 52 | 17 | 16 |    |     |    |    | 33       |
| Saia           |    | 15 | 18 | 59 |    | 15 | 5  |    |    | 5  |    | 23  |    | 2  | 12 32    |
| Salinas        | 50 |    |    | 56 |    | 41 | 68 |    | 9  | 14 |    | 15  |    |    | 47       |
| Schroeter      | 32 | 8  | 7  | 56 |    |    |    |    |    |    |    |     |    |    | 61       |
| van der Boon   | 25 | 8  | 10 | 51 |    | 22 | 55 |    | 5  | 21 |    | 10  | 23 | 24 | 24 46 26 |
| Mouillet       | 25 | 20 | 9  | 49 |    | 18 | 68 |    | 25 |    |    | 24  |    |    | 20       |
| Liang          | 32 | 15 | 9  |    |    | 26 | 57 |    |    |    |    |     |    |    | 72       |
| Pilgrim        | 26 |    |    | 56 | 16 | 24 | 78 | 60 |    | 9  |    | 25  | 18 | 23 | 21       |
| Bosmans        | 9  |    |    |    |    |    |    |    |    |    |    |     |    |    |          |
| D'Ancona       | 29 |    |    |    |    | 29 |    |    |    | 24 |    |     |    |    |          |
| Ewe            | 21 |    |    |    | 37 |    | 60 |    |    | 12 |    | 43  | 23 |    | 40 27    |
| Fraccaro       | 16 | 14 | 13 | 52 |    |    |    |    | 55 | 11 |    | 8   | 34 |    | 63 22    |
| Guetta         | 27 | 24 | 16 |    | 16 |    | 83 |    |    |    |    |     |    | 23 | 54       |
| Khawaja        | 19 | 13 | 10 |    |    |    |    |    |    |    |    |     |    |    |          |
| Calvi          | 17 | 3  |    | 50 | 30 | 31 | 85 | 58 |    | 16 |    |     | 27 | 32 | 17       |
| Chorianopoulos | 22 | 7  | 14 |    |    |    |    |    |    | 4  |    |     |    |    | 32       |
| Hayashida      |    |    |    | 50 | 7  |    | 71 | 49 |    | 13 |    | 34  | 15 | 30 | 2 64 37  |
| Bleiziffer     | 26 | 17 | 4  |    |    |    |    |    |    |    |    |     |    |    |          |
| Eltchnainoff   |    |    |    | 51 |    | 27 | 69 |    |    | 10 |    | 734 | 23 |    | 25 41    |
| Baan           | 42 | 6  | 9  |    |    | 32 | 53 | 21 |    |    |    |     |    | 27 | 12 47 21 |
| Ewe            | 20 |    |    |    | 35 | 25 | 77 | 46 |    |    |    | 35  | 18 | 22 | 19       |
| Ferriera       | 28 |    |    |    |    | 50 | 97 |    |    |    |    |     |    | 16 | 13 41 56 |
| Godino         |    |    |    |    |    | 29 | 26 |    | 37 | 23 |    | 35  | 29 | 24 | 26 46    |
| Erkopic        | 34 | 1  | 14 | 51 |    | 30 | 82 |    |    |    |    |     |    |    | 56 46    |
| Haworth        | 18 | 9  | 21 |    |    | 9  |    |    |    | 17 |    | 21  |    | 23 | 23 9     |
| Piazza         | 28 | 15 | 6  |    |    |    |    |    |    |    |    |     |    |    |          |
| Rodes-Cabau    | 34 |    |    | 55 | 6  | 23 | 74 | 71 |    | 23 |    | 35  | 51 | 29 | 34 69    |
| Roten          | 12 | 16 | 19 | 51 |    | 22 | 72 |    |    |    |    |     |    |    | 55       |
| Lefevre        | 25 |    |    | 53 |    | 32 | 74 |    | 42 |    |    | 34  | 21 | 25 | 32 60 42 |
| Attias         |    |    |    | 52 |    |    |    |    |    |    |    | 28  | 13 | 19 | 22 51 33 |
| Petronio       |    | 12 | 8  |    | 5  | 27 | 75 |    |    | 8  |    | 19  | 22 | 29 | 16 22    |
| Thielmann      |    |    |    | 51 |    | 28 | 92 |    | 54 | 18 |    | 62  | 53 | 36 | 26 56 39 |
| Aslan          | 21 | 38 |    |    |    | 36 | 61 |    | 28 |    |    |     |    |    | 21 64    |
| Hamdan         | 14 | 1  | 10 |    |    | 38 | 84 | 70 |    |    |    |     | 14 | 22 | 21 49    |
| Jilaihawi      | 17 | 6  | 15 | 65 |    | 31 |    |    | 24 |    | 2  |     |    |    | 26       |
| Matsushita     | 31 |    | 15 | 57 |    | 30 | 85 | 56 | 42 | 13 |    |     |    |    | 38       |
| Tretter        | 31 | 7  | 17 |    |    | 31 | 90 |    | 29 | 9  |    | 19  |    |    | 67 21    |

---

Zaid

---

Ahmad

37

5

45

91

21

32

---

**Table S6: Procedural characteristics and type of valves used across the included studies (all numbers indicate percentages).**

| Author         | Apical access | Femoral access | MR-Pro ADM >= 1.3 nmol/l | TAVR using ACURATE TA device | Medtronic Corevalve | Edward Sapien | Lotus | Transarterial vs transapical comparison (y or n) | Trans Subclavian vs Transfemoral (y or n) |
|----------------|---------------|----------------|--------------------------|------------------------------|---------------------|---------------|-------|--------------------------------------------------|-------------------------------------------|
| Hamandi        | 12.7          | 84.5           |                          |                              | 9.8                 | 86.9          |       | y                                                | n                                         |
| Sharma         | 17.6          | 77.8           |                          |                              |                     | 100           |       | y                                                | n                                         |
| Thiele         |               | 100            |                          |                              |                     | 50            |       | n                                                | n                                         |
| Kochman        |               | 100            |                          |                              |                     |               | 100   | n                                                | n                                         |
| Meduri         |               |                |                          |                              | 33.8                |               | 66.1  | n                                                | n                                         |
| Karacop        |               | 36.6(100%)     |                          |                              | 36.6                |               |       | n                                                | n                                         |
| Ay             |               | 100            |                          |                              | 33.2                | 50            | 2.9   | n                                                | n                                         |
| Kaneko         |               | 100            |                          |                              | 100                 |               |       |                                                  |                                           |
| Reardon        |               |                |                          |                              | 33.4                |               | 66.5  |                                                  |                                           |
| Giordano       |               | 90.2           |                          | 11.8                         | 35.6                | 27.3          | 7.64  | n                                                | n                                         |
| Doshi          |               | 79.6           |                          |                              |                     |               |       |                                                  |                                           |
| Bhardwaj       |               | 94.3           |                          |                              | 18                  |               | 82    |                                                  |                                           |
| Gonska         |               | 100            |                          |                              | 4.4                 | 58.8          | 36.7  | n                                                | n                                         |
| Yousif         | 14.4          | 84.4           |                          |                              | 50.5                | 48.4          |       | y                                                | n                                         |
| Ball           |               |                |                          |                              | 70.8                | 11.5          | 4.8   |                                                  |                                           |
| Eitan          |               | 100            |                          |                              |                     | 59.7          |       | n                                                | n                                         |
| Finkelstei     |               | 94.1           |                          |                              | 69.6                | 30.3          |       | n                                                | n                                         |
| Monteiro       |               | 96.1           |                          |                              | 74.3                | 25.6          |       | n                                                | n                                         |
| Enriquez-R     |               | 94.4           |                          |                              |                     | 55.5          |       | n                                                | n                                         |
| Rogers         | 2.3           | 90.6           |                          |                              | 28.8                | 71.2          |       | y                                                | n                                         |
| Soliman        |               |                |                          |                              | 57.5                | 42.5          |       | n                                                | n                                         |
| vanMourik      |               | 100            |                          |                              |                     | 100           |       | n                                                | n                                         |
| Kley           | 58.7          | 41.3           |                          |                              | 7.5                 | 92.5          |       | n                                                | n                                         |
| Zaman          | 1             | 98.9           |                          |                              |                     |               | 100   | n                                                | n                                         |
| Kahraman       |               | 100            |                          |                              |                     |               |       | n                                                | n                                         |
| Sawaya         |               | 63.9           |                          |                              |                     | 100           |       | n                                                | n                                         |
| Ben-Shoshan    |               | 100            |                          |                              |                     | 53.4          |       | n                                                | n                                         |
| Ramkumar       | 1             | 99             |                          |                              |                     |               | 100   | n                                                | n                                         |
| Rouge          | 48            | 52             |                          |                              | 8                   | 91.3          |       | y                                                | n                                         |
| Gauthier       | 33.5          | 66.5           |                          |                              | 3.4                 | 93.1          |       | y                                                | n                                         |
| Boerlage       |               | 100            |                          |                              | 100                 |               |       | N                                                | N                                         |
| Simms          |               |                |                          |                              | 100                 |               |       | n                                                | n                                         |
| Nuis           |               | 97             |                          |                              | 100                 |               |       | n                                                | y                                         |
| Pulse          | 53.9          | 46.1           |                          |                              | 13.3                | 86.6          |       | y                                                | n                                         |
| Ledwoch        | 9.8           | 86.9           |                          |                              | 79.5                | 20.5          |       | n                                                | n                                         |
| Akin           |               | 100            |                          |                              | 100                 |               |       | n                                                | n                                         |
| Bagur          | 45.7          | 54.3           |                          |                              |                     | 83.7          |       | y                                                | n                                         |
| De Carlo       |               |                |                          |                              | 100                 |               |       | n                                                | n                                         |
| Gilard         | 18.2          | 75.9           |                          |                              | 32.6                | 65.9          |       | y                                                | y                                         |
| Muniz-Garcia   |               | 89.6           |                          |                              | 100                 |               |       | n                                                | n                                         |
| Saia           |               | 81.7           |                          |                              | 100                 |               |       | n                                                | y                                         |
| Salinas        | 8.9           | 91.1           |                          |                              |                     | 100           |       | y                                                | n                                         |
| Schroeter      |               | 100            |                          |                              | 100                 |               |       | n                                                | n                                         |
| van der Boon   |               | 91.6           |                          |                              | 100                 |               |       | n                                                | y                                         |
| Mouillet       |               |                |                          |                              | 100                 |               |       | n                                                | n                                         |
| Liang          |               |                |                          |                              | 71.7                | 28.3          |       | n                                                | n                                         |
| Pilgrim        | 21.5          | 76.9           |                          |                              | 64                  |               |       | y                                                | y                                         |
| Bosmans        | 26.9          | 70.7           |                          |                              | 42.9                | 57            |       | y                                                | n                                         |
| D'Ancona       | 100           |                |                          |                              |                     | 100           |       |                                                  |                                           |
| Ewe            | 56.7          | 43.3           |                          |                              |                     | 100           |       | y                                                | n                                         |
| Fraccaro       |               | 93.8           |                          |                              | 100                 |               |       | n                                                | y                                         |
| Guetta         |               | 100            |                          |                              | 100                 |               |       | n                                                | n                                         |
| Khawaja        |               |                |                          |                              | 100                 |               |       | n                                                | n                                         |
| Calvi          |               | 100            |                          |                              | 100                 |               |       | n                                                | n                                         |
| Chorianopoulos |               | 100            |                          |                              | 100                 |               |       | n                                                | n                                         |
| Hayashida      | 31.9          | 65             |                          |                              | 14.6                | 85.4          |       | y                                                | y                                         |
| Bleiziffer     | 23.2          | 72.9           |                          |                              | 78                  | 22            |       | n                                                | n                                         |
| Eltchnainoff   | 29.1          | 65.9           |                          |                              | 32                  | 68            |       | y                                                | y                                         |
| Baan           |               |                |                          |                              | 100                 |               |       | n                                                | n                                         |
| Ewe            | 49            | 51             |                          |                              |                     | 100           |       | y                                                | n                                         |
| Ferriera       |               | 100            |                          |                              | 100                 |               |       | n                                                | n                                         |
| Godino         | 10.9          | 78.1           |                          |                              | 20.4                | 57.7          |       | y                                                | y                                         |
| Erkapic        | 28            | 72             |                          |                              | 72                  | 28            |       | y                                                |                                           |
| Haworth        |               | 100            |                          |                              | 100                 |               |       | n                                                | n                                         |
| Piazza         |               | 100            |                          |                              | 100                 |               |       | n                                                | n                                         |
| Rodes-Cabau    | 51            | 49             |                          |                              |                     | 100           |       | y                                                | n                                         |



|                   |      |      |      |      |    |   |
|-------------------|------|------|------|------|----|---|
| <b>Roten</b>      | 25   | 75   | 61.2 | 38.8 | y  | n |
| <b>Lefevre</b>    | 47   | 53   |      | 100  | y  | n |
| <b>Attias</b>     |      | 100  | 13.3 | 86.7 | y  | y |
| <b>Petronio</b>   | 10.5 | 89.5 | 100  |      | n  | y |
| <b>Thielmann</b>  | 61.5 | 38.5 |      | 100  | y  |   |
| <b>Aslan</b>      | 0    | 100  | 52.9 | 47.1 | n  | n |
| <b>Hamdan</b>     | 8.2  | 80.8 | 91.7 |      | n  | n |
| <b>Jilaihawi</b>  |      | 99.6 |      |      | n  | n |
| <b>Matsushita</b> |      |      |      | 74.4 | n  | n |
| <b>Tretter</b>    |      |      | 38   | 47   | 15 | n |
| <b>Zaid</b>       |      |      |      | 100  | n  | n |
| <b>Ahmad</b>      |      |      |      | 100  | n  | n |

**\*n=no, y=yes**

**Table S7: Proportion of PPM implantation across different baseline comorbidities in the included studies**

| <b>Variable</b>          | <b>Total</b> | <b>PPM</b> | <b>PPM (%)</b> | <b>No PPM</b> | <b>No PPM (%)</b> |
|--------------------------|--------------|------------|----------------|---------------|-------------------|
| <b>Diabetes Mellitus</b> | 5904         | 1034       | 17.51          | 4870          | 82.49             |
| <b>Hypertension</b>      | 14879        | 3401       | 22.86          | 11478         | 77.14             |
| <b>Hyperlipidemia</b>    | 2634         | 104        | 3.95           | 2530          | 96.05             |
| <b>COPD</b>              | 3034         | 314        | 10.35          | 2720          | 89.65             |
| <b>Prior CVA</b>         | 1747         | 135        | 7.73           | 1612          | 92.27             |
| <b>CKD</b>               | 5839         | 1168       | 20.00          | 4671          | 80.00             |
| <b>Liver Cirrhosis</b>   | 215          | 50         | 23.26          | 165           | 76.74             |
| <b>PAD</b>               | 2928         | 292        | 9.97           | 2636          | 90.03             |
| <b>Smokers</b>           | 425          | 38         | 8.94           | 387           | 91.06             |
| <b>Prior MI</b>          | 2776         | 233        | 8.39           | 2543          | 91.61             |
| <b>Prior PCI</b>         | 2581         | 353        | 13.68          | 2228          | 86.32             |
| <b>Prior CABG</b>        | 2453         | 234        | 9.54           | 2219          | 90.46             |

COPD- Chronic Obstructive Pulmonary Disease, CVA- Cerebrovascular Accident, CKD- Chronic Kidney Disease, PAD- Peripheral arterial disease, MI- Myocardial Infarction, PCI- Percutaneous coronary intervention, CABG- Coronary Artery Bypass graft

**Table S8: Pooled estimates of anatomical and valvular predictors for PPM implantation in TAVR**

| Anatomical Variants           |                   | Valvular Variants                |                   |
|-------------------------------|-------------------|----------------------------------|-------------------|
| 23mm vs. 26mm prosthesis (2)  | 1.12 (0.62-2.03)  | LOTUS vs. EvolutR                | 1.44 (0.94-2.20)  |
| 29mm vs. 23mm(7)              | 1.49 (1.06-2.08)  | LOTUS vs. ESV                    | 2.80 (0.76-10.32) |
| IV septum >22mm vs. <22mm (1) | 1.65 (0.55-4.93)  | LOTUS vs. MCRS                   | 1.61 (1.23-2.1)   |
| IV septum>11mm vs. <11mm (1)  | 1.71 (0.17-17.41) | P-HTN (>60mmHg) vs. No P-HTN (3) | 1.78 (0.82-3.89)  |
| LVOT>22mm vs. <22mm (1)       | 1.65 (0.55-4.93)  | Severe MR vs. No MR (3)          | 3.30 (0.59-18.32) |

Abbreviations: mm: millimeter, PPM- Permanent pacemaker, TAVR-Transaortic valve replacement, IV septum- interventricular septum, LVOT- Left ventricular outflow tract, P-HTN: Pulmonary hypertension, MCRS - Medtronic CoreValve Revalving System, ESV: Edwards SAPIEN valve,

**Table S9: Predictors of PPM Implantation across different valve types**

| Variables                            | Medtronic CoreValve | Edward SAPIENS Valve | LOTUS             | EVOLUT R           |
|--------------------------------------|---------------------|----------------------|-------------------|--------------------|
| Comparison                           | OR (95%CI)          | OR (95%CI)           | OR (95%CI)        | OR (95%CI)         |
| <b>Male vs. Female (MCV)</b>         | 1.33 (1.02-1.73)    | 1.25(0.70-2.24)      | -                 | 2.14 (0.73-6.27)*  |
| <b>1st HB vs. No 1st HB</b>          | 1.95 (1.18-3.24)    | 1.56 (0.20-11.8)     | 0.19 (0.04-0.89)* | 1.47 (0.41-5.23)*  |
| <b>LBBB vs. No LBBB</b>              | 0.99(0.66-1.48)     | 0.28 (0.03-2.39)     | 0.34 (0.04-2.86)* | 0.29 (0.02-2.28)*  |
| <b>LAHB vs. No LAHB</b>              | 1.94 (1.11-3.38)    | 1.95 (0.32-12.01)    | -                 | -                  |
| <b>LPHB vs. No LPHB</b>              | 1.19 (0.05-29.88)   | 2.29(0.12-41.9)      | -                 | -                  |
| <b>RBBB vs. No RBBB</b>              | 4.03 (2.47-6.56)    | 14 (0.51-387)*       | 1.01 (0.18-5.54)* | 4.31 (1.02-18.22)* |
| <b>Bifascicular Block</b>            | -                   | 3.84 (0.67-21.9)     | -                 | -                  |
| <b>IPB vs. No IPB</b>                | 8.04 (3.53-18.2)    | 12.83 (1.26-130)*    | -                 | -                  |
| <b>AF vs. No AF</b>                  | 1.39 (0.86-2.26)    | 0.70 (0.34-1.43)     | 0.12 (0.01-0.92)* | 0.55 (0.16-1.85)*  |
| <b>Transfemoral vs. Subclavian</b>   | 0.35 (0.09-1.31)    | -                    | -                 | -                  |
| <b>Transarterial vs. Transapical</b> | -                   | 1.11 (0.46-2.72)     | -                 | -                  |

**\*Less than 3 studies with small sample size were used to calculate these values**

Abbreviations: PPM- Permanent pacemaker, MCV- medtronic corevalve, HB- Heart block, LBBB- left bundle branch block, LAHB- Left anterior hemiblock, LPHB- Left posterior hemiblock, RBBB- Right bundle branch block, IPB- intraprocedural block, AF- atrial fibrillation

**Table S10: Sensitivity and subgroup analysis based on sample size and study design**

| Variable                                                                | Sensitivity analysis based on sample size (<200 removed) | Sensitivity analysis based on study design (RCT removed) |
|-------------------------------------------------------------------------|----------------------------------------------------------|----------------------------------------------------------|
| <b>Age</b>                                                              | 1.25 (0.98-1.60)                                         | -                                                        |
| <b>Male sex</b>                                                         | 1.47 (1.12-1.91)                                         | -                                                        |
| <b>First degree heart block</b>                                         | 0.68 (0.14-3.30)                                         | 0.86 (0.27-2.80)                                         |
| <b>Mobitz type 1 2nd Degree Heart Block</b>                             | 6.77 (2.82-16.22)                                        | -                                                        |
| <b>Mobitz type 2 2nd Degree Heart Block</b>                             | 3.89 (2.54-5.95)                                         | -                                                        |
| <b>Atrial Fibrillation</b>                                              | 1.08 (0.89-1.32)                                         | -                                                        |
| <b>Left Anterior Hemiblock</b>                                          | 1.60 (1.17-2.18)                                         | 1.87 (1.19-2.93)                                         |
| <b>Left Posterior Hemiblock</b>                                         | 1.23 (0.05-30.77)                                        | -                                                        |
| <b>Intra-procedural AV Block</b>                                        | 8.04 (3.53-18.29)                                        | -                                                        |
| <b>Left bundle branch block</b>                                         | 1.14 (0.84-1.55)                                         | 1.01 (0.76-1.35)                                         |
| <b>Right bundle branch block</b>                                        | 4.12 (2.83-6)                                            | 4.21 (3.13-5.66)                                         |
| <b>Bifascicular Block</b>                                               | 2.38 (1.94-6.01)                                         | -                                                        |
| <b>Heart Failure with Preserved Ejection Fraction</b>                   | 1.60 (0.88-2.91)                                         | -                                                        |
| <b>Transarterial Approach with Transapical Approach (Edward Sapien)</b> | 1.44 (0.34-6.04)                                         | -                                                        |
| <b>Transfemoral approach with Subclavian Approach (MCV)</b>             | 0.84 (0.41-1.75)                                         | -                                                        |
| <b>Medtronic CoreValve with Edward SAPIEN</b>                           | 2.87 (1.96-4.21)                                         | 3.03 (2.57-3.56)                                         |
| <b>LOTUS valve with Medtronic CoreValve</b>                             | 1.76 (1.38-2.25)                                         | 1.75 (1.38-2.22)                                         |
| <b>Edward SAPIEN valve with Medtronic EvolutR valve</b>                 | 0.81 (0.58-1.14)                                         | -                                                        |

**Table S11: Number of studies and patients with PPM and total patients across different predictors.**

| <b>Variable</b>                   | <b>PPM/Predictor present</b> | <b>PPM/Predictor absent</b> |
|-----------------------------------|------------------------------|-----------------------------|
| <b>Age &gt;80 (n=5)</b>           |                              |                             |
| Ledwoch                           | 278/788                      | 108/359                     |
| Kley                              | 14/135                       | 11/105                      |
| Ay                                | 14/132                       | 11/142                      |
| Kahraman                          | 4/69                         | 2/67                        |
| Ramkumar                          | 7/23                         | 18/81                       |
| <b>Sex (male) (n=31)</b>          |                              |                             |
| Monteiro                          | 80/321                       | 55/349                      |
| Meduri                            | 122/345                      | 123/359                     |
| Bharadwaj                         | 20/195                       | 24/188                      |
| Gonska                            | 88/288                       | 80/324                      |
| Karacop                           | 35/109                       | 14/41                       |
| Yousif                            | 59/270                       | 44/276                      |
| Kaneko                            | 8/30                         | 9/62                        |
| Boerlage-Van Dijk                 | 6/40                         | 17/65                       |
| Ball                              | 25/118                       | 19/91                       |
| Tretter                           | 21/93                        | 20/107                      |
| Ledwoch                           | 174/468                      | 212/679                     |
| Bleiziffer                        | 13/68                        | 22/91                       |
| Baan                              | 2/14                         | 5/13                        |
| Roten                             | 13/31                        | 10/36                       |
| D'Ancona                          | 8/107                        | 12/215                      |
| Fraccaro                          | 15/29                        | 10/35                       |
| Akin                              | 10/18                        | 13/27                       |
| Calvi                             | 22/64                        | 30/98                       |
| Bagur                             | 14/176                       | 16/235                      |
| De Carlo                          | 37/128                       | 29/147                      |
| Munoz-Garcia                      | 21/65                        | 27/109                      |
| Saia                              | 8/24                         | 9/36                        |
| Simms                             | 10/48                        | 7/52                        |
| van der Boon                      | 19/77                        | 17/90                       |
| Mouillet                          | 7/25                         | 14/54                       |
| Ahmad                             | 11/136                       | 6/133                       |
| Matsushita                        | 45/94                        | 69/148                      |
| Hamdan                            | 7/33                         | 14/40                       |
| Aslan                             | 9/51                         | 15/89                       |
| Zaid                              | 31/308                       | 26/224                      |
| Jilawahi                          | 10/142                       | 14/106                      |
| Hayashida                         | 10/129                       | 7/131                       |
| <b>Atrial fibrillation (n=31)</b> |                              |                             |
| Monteiro                          | 19/91                        | 116/579                     |
| Doshi                             | 925/3653                     | 1086/4557                   |
| Meduri                            | 78/202                       | 167/502                     |
| Bharadwaj                         | 11/163                       | 33/220                      |
| Gonska                            | 66/220                       | 102/392                     |
| Kaneko                            | 4/31                         | 13/61                       |
| Zaman                             | 3/19                         | 23/76                       |

|                                            |          |           |
|--------------------------------------------|----------|-----------|
| Boerlage-Van Dijk                          | 7/30     | 98/75     |
| Ball                                       | 18/67    | 26/142    |
| Matsushita                                 | 40/76    | 74/166    |
| Hamadan                                    | 4/10     | 17/63     |
| Ledwoch                                    | 103/277  | 283/870   |
| Bleiziffer                                 | 9/41     | 26/118    |
| Baan                                       | 4/10     | 3/17      |
| Erkapic                                    | 5/17     | 12/33     |
| Roten                                      | 4/8      | 19/59     |
| D'Ancona                                   | 5/93     | 15/229    |
| Calvi                                      | 11/27    | 41/135    |
| Bagur                                      | 4/96     | 26/315    |
| Chorianopoulos                             | 6/29     | 40/101    |
| Munoz-Garcia                               | 14/56    | 34/118    |
| Salinas                                    | 2/17     | 1/17      |
| Schroeter                                  | 16/28    | 16/60     |
| Simms                                      | 7/29     | 10/71     |
| Aslan                                      | 6/29     | 18/111    |
| Van der Boon                               | 12/41    | 24/126    |
| Roten                                      | 4/8      | 19/59     |
| Mouillet                                   | 6/21     | 15/58     |
| Tretter                                    | 13/61    | 28/139    |
| Ahmad                                      | 8/99     | 9/170     |
| Jilawahi                                   | 4/43     | 20/205    |
| <b>1st degree AV block (n=16)</b>          |          |           |
| Monteiro                                   | 29/104   | 106/566   |
| Doshi                                      | 127/2857 | 1822/5353 |
| Meduri                                     | 25/56    | 220/648   |
| Sharma                                     | 5/47     | 20/179    |
| Kaneko                                     | 4/17     | 13/75     |
| Zaman                                      | 8/23     | 18/192    |
| Boerlage-Van Dijk                          | 5/19     | 18/86     |
| Hamadan                                    | 3/13     | 18/60     |
| Baan                                       | 2/5      | 5/22      |
| Tretter                                    | 2/22     | 27/187    |
| Bleiziffer                                 | 7/22     | 28/137    |
| Erkapic                                    | 4/10     | 13/40     |
| Bagur                                      | 1/38     | 29/373    |
| Jilawahi                                   | 4/29     | 20/219    |
| Chorianopoulos                             | 9/15     | 37/115    |
| De Carlo                                   | 17/50    | 49/225    |
| <b>2nd degree Mobitz I AV block (n=3)</b>  |          |           |
| Monteiro                                   | 1/1      | 134/669   |
| Doshi                                      | 14/21    | 1935/8189 |
| Liang                                      | 1/1      | 4/52      |
| <b>2nd degree Mobitz II AV block (n=2)</b> |          |           |
| Monteiro                                   | 0/1      | 135/669   |
| Doshi                                      | 48/86    | 1963/8124 |
| <b>3rd degree AV block (n=4)</b>           |          |           |
| Doshi                                      | 622/777  | 1351/7457 |
| Karacop                                    | 49/49    | 0/101     |

|                                        |         |           |
|----------------------------------------|---------|-----------|
| Sharma                                 | 8/20    | 0/5       |
| Liang                                  | 3/3     | 2/50      |
| <b>Left anterior hemiblock (n=9)</b>   |         |           |
| Meduri                                 | 51/121  | 194/583   |
| Sharma                                 | 7/34    | 18/192    |
| Ball                                   | 2/7     | 42/202    |
| Erkapic                                | 4/8     | 13/42     |
| Calvi                                  | 1/4     | 51/158    |
| Bagur                                  | 3/29    | 27/382    |
| De Carlo                               | 18/46   | 48/229    |
| Jilawahi                               | 1/12    | 23/236    |
| Van der Boon                           | 5/19    | 31/148    |
| <b>Left posterior hemiblock (n=4)</b>  |         |           |
| Sharma                                 | 2/3     | 23/223    |
| Ball                                   | 0/1     | 44/208    |
| Jilawahi                               | 1/4     | 23/244    |
| Van der Boon                           | 0/1     | 36/166    |
| <b>Intraprocedural AV block (n=3)</b>  |         |           |
| Sharma                                 | 13/30   | 12/196    |
| Bleiziffer                             | 18/37   | 17/122    |
| Munoz-Garcia                           | 22/34   | 26/140    |
| <b>Left bundle branch block (n=29)</b> |         |           |
| Monteiro                               | 15/93   | 120/577   |
| Doshi                                  | 260/731 | 1751/7479 |
| Meduri                                 | 20/56   | 225/648   |
| Bharadwaj                              | 3/39    | 41/344    |
| Hamandi                                | 13/52   | 97/372    |
| Sharma                                 | 1/23    | 24/203    |
| Kaneko                                 | 0/7     | 17/92     |
| Zaman                                  | 1/8     | 26/87     |
| Boerlage-Van Dijk                      | 1/14    | 22/91     |
| Ball                                   | 28/100  | 16/109    |
| Sawaya                                 | 0/14    | 43/230    |
| Hamadan                                | 1/9     | 12/72     |
| Roten                                  | 1/11    | 22/56     |
| Bleiziffer                             | 7/27    | 28/132    |
| Eltchnainoff                           | 4/27    | 25/182    |
| Baan                                   | 0/2     | 7/25      |
| Erkapic                                | 0/5     | 17/45     |
| Haworth                                | 1/3     | 7/27      |
| Roten                                  | 1/11    | 22/56     |
| Khawaja                                | 14/32   | 67/211    |
| Calvi                                  | 2/5     | 50/157    |
| Bagur                                  | 1/33    | 29/378    |
| Chorianopoulos                         | 3/9     | 43/121    |
| De Carlo                               | 9/37    | 57/238    |
| Saia                                   | 1/9     | 16/51     |
| Schroeter                              | 2/7     | 30/81     |
| Jilawahi                               | 0/14    | 24/234    |
| Tretter                                | 1/14    | 40/186    |
| Van der Boon                           | 3/14    | 33/153    |



| <b>Right bundle branch block (n=29)</b>              |        |           |
|------------------------------------------------------|--------|-----------|
| Monteiro                                             | 36/71  | 99/599    |
| Doshi                                                | 96/220 | 1791/7990 |
| Meduri                                               | 68/85  | 177/619   |
| Bharadwaj                                            | 11/50  | 33/333    |
| Sharma                                               | 10/28  | 15/198    |
| Kaneko                                               | 4/9    | 13/83     |
| Zaman                                                | 6/7    | 21/88     |
| Boerlage-Van Dijk                                    | 5/11   | 18/94     |
| Ball                                                 | 11/23  | 33/186    |
| Sawaya                                               | 12/29  | 31/215    |
| Hamadan                                              | 4/7    | 17/66     |
| Matsushita                                           | 19/35  | 95/207    |
| Bleiziffer                                           | 3/6    | 32/153    |
| Baan                                                 | 0/2    | 7/25      |
| Ferriera                                             | 4/7    | 4/20      |
| Erkopic                                              | 6/7    | 11/43     |
| Haworth                                              | 6/7    | 2/23      |
| Piazza                                               | 5/5    | 12/75     |
| Roten                                                | 10/13  | 13/54     |
| Guetta                                               | 10/11  | 18/59     |
| Khawaja                                              | 15/23  | 66/220    |
| Bagur                                                | 7/20   | 23/391    |
| Chorianopoulos                                       | 12/18  | 34/112    |
| De Carlo                                             | 15/32  | 51/243    |
| Saia                                                 | 4/11   | 13/49     |
| Van der Boon                                         | 11/17  | 25/150    |
| Jilawahi                                             | 8/37   | 16/211    |
| Tretter                                              | 18/34  | 23/166    |
| Mouillet                                             | 3/7    | 18/72     |
| <b>Bifascicular block (n=4)</b>                      |        |           |
| Sharma                                               | 7/16   | 18/210    |
| Ball                                                 | 2/3    | 42/206    |
| Jilawahi                                             | 2/8    | 22/240    |
| Sawaya                                               | 12/45  | 31/199    |
| <b>23mm vs 26mm prosthesis (n=2)</b>                 |        |           |
| D'Ancona                                             | 6/115  | 14/207    |
| Bagur                                                | 16/187 | 14/223    |
| <b>23mm vs 29mm prosthesis (n=7)</b>                 |        |           |
| Akin                                                 | 10/22  | 13/23     |
| Saia                                                 | 10/35  | 7/28      |
| Fraccaro                                             | 12/36  | 13/28     |
| Guetta                                               | 10/33  | 15/37     |
| Boon                                                 | 10/56  | 26/109    |
| Chorianopoulos                                       | 12/46  | 34/84     |
| Garcia                                               | 24/97  | 24/77     |
| <b>Severe Pulmonary Hypertension (n=3)</b>           |        |           |
| Guetta                                               | 9/15   | 16/55     |
| Munoz-Garcia                                         | 16/39  | 32/135    |
| Calvi                                                | 26/83  | 26/79     |
| <b>Interventricular septum greater than 11mm (1)</b> |        |           |

|                                                          |         |          |
|----------------------------------------------------------|---------|----------|
| Guetta                                                   | 24/66   | 1/4      |
| <b>Interventricular septum greater than 22mm (1)</b>     |         |          |
| Guetta                                                   | 8/18    | 17/52    |
| <b>Moderate/Severe MR (3)</b>                            |         |          |
| Akin                                                     | 22/41   | 1/45     |
| Boon                                                     | 6/24    | 30/143   |
| Bagur                                                    | 9/104   | 21/307   |
| <b>MCRS vs. Edwards SAPIEN(n=16)</b>                     |         |          |
| Monteiro                                                 | 119/498 | 16/172   |
| Thiele                                                   | 49/213  | 41/214   |
| Ball                                                     | 36/148  | 1/24     |
| Soliman                                                  | 4/23    | 1/17     |
| Ledwoch                                                  | 352/912 | 34/235   |
| Bleiziffer                                               | 33/124  | 2/35     |
| Godino                                                   | 12/46   | 7/61     |
| Erkopic                                                  | 16/36   | 1/14     |
| Roten                                                    | 20/41   | 3/26     |
| Bosmans                                                  | 31/121  | 9/163    |
| Gilard                                                   | 252/874 | 243/1793 |
| Liang                                                    | 5/38    | 0/15     |
| Attitias                                                 | 2/11    | 5/72     |
| Ben-Shoshan                                              | 22/88   | 26/108   |
| Eltchnainoff                                             | 20/78   | 9/166    |
| Rogue                                                    | 6/12    | 12/135   |
| <b>LOTUS vs. MCV (n=4)</b>                               |         |          |
| Ball                                                     | 3/10    | 36/148   |
| Meduri                                                   | 71/192  | 16/53    |
| Gonska                                                   | 98/225  | 49/150   |
| Reardon                                                  | 202/607 | 61/305   |
| <b>LOTUS vs. Evolut R (n=1)</b>                          |         |          |
| Giordana                                                 | 35/151  | 122/703  |
| <b>LOTUS vs. Edwards SAPIEN (n=2)</b>                    |         |          |
| Ball                                                     | 3/10    | 1/24     |
| Giordana                                                 | 35/151  | 72/541   |
| <b>Edwards SAPIEN vs. EVOLUT R (n=5)</b>                 |         |          |
| Eitan                                                    | 10/50   | 8/28     |
| Rodriguez                                                | 12/64   | 6/80     |
| Rogers                                                   | 9/108   | 9/74     |
| Ben-Shoshan                                              | 26/108  | 22/88    |
| Finklestein                                              | 32/223  | 90/512   |
| <b>Preserved LVEF (n=5)</b>                              |         |          |
| Simms                                                    | 0/10    | 17/90    |
| Fraccaro                                                 | 10/39   | 53/313   |
| Ewe                                                      | 1/41    | 6/94     |
| Ewe                                                      | 0/97    | 2/50     |
| Munoz-Garcia                                             | 8/23    | 40/151   |
| <b>Access route (transfemoral vs. transapical (n=12)</b> |         |          |
| Eltchnainoff                                             | 22/161  | 4/71     |
| Sharma                                                   | 21/176  | 4/40     |
| Rodes-Cabau                                              | 6/168   | 11/177   |
| Roten                                                    | 20/50   | 3/17     |

|                                                                |         |          |
|----------------------------------------------------------------|---------|----------|
| Bosmans                                                        | 35/232  | 5/88     |
| Ewe                                                            | 2/45    | 2/59     |
| Lefevre                                                        | 1/61    | 3/69     |
| Bagur                                                          | 15/223  | 15/188   |
| Gauthier                                                       | 10/66   | 3/59     |
| Thielmann                                                      | 4/14    | 0/20     |
| Godino                                                         | 17/107  | 3/15     |
| Erkopic                                                        | 16/36   | 1/14     |
| <b>Access route (transfemoral vs. subclavian) - MCRS (n=4)</b> |         |          |
| Petronio                                                       | 74/460  | 10/54    |
| Saia                                                           | 10/49   | 7/11     |
| Fraccaro                                                       | 22/60   | 3/4      |
| Eltchnainoff                                                   | 22/161  | 3/12     |
| <b>Self-Expanding vs. Balloon-Expanding valves (n=18)</b>      |         |          |
| Liang                                                          | 5/38    | 0/15     |
| Soliman                                                        | 4/23    | 1/17     |
| Erkopic                                                        | 16/36   | 1/14     |
| Ball                                                           | 36/148  | 1/24     |
| Attitias                                                       | 2/11    | 5/72     |
| Bleiziffer                                                     | 33/124  | 2/35     |
| Roten                                                          | 20/41   | 3/26     |
| Eitan                                                          | 9/37    | 5/55     |
| Rodriguez                                                      | 6/80    | 12/64    |
| Giordana                                                       | 12/46   | 7/61     |
| Rogers                                                         | 9/74    | 9/108    |
| Bosman                                                         | 31/121  | 9/163    |
| Ben-Shoshan                                                    | 22/88   | 26/108   |
| Montiero                                                       | 119/498 | 16/172   |
| Thiel                                                          | 49/213  | 41/214   |
| Finkelstein                                                    | 90/512  | 32/223   |
| Ledowoch                                                       | 352/912 | 34/235   |
| Aslan                                                          | 15/74   | 9/66     |
| Gilard                                                         | 252/874 | 243/1793 |
| <b>Mechanically-Expandable vs. Self-Expanding Valves (n=5)</b> |         |          |
| Ball                                                           | 3/10    | 36/148   |
| Meduri                                                         | 71/192  | 16/53    |
| Gonska                                                         | 98/225  | 49/150   |
| Giordana                                                       | 35/151  | 122/703  |
| Reardon                                                        | 202/607 | 61/305   |
| <b>Heart Failure (Unspecified) (n=4)</b>                       |         |          |
| Meduri                                                         | 182/531 | 63/173   |
| Bharadwaj                                                      | 8/105   | 36/278   |
| Ahmad                                                          | 3/39    | 14/230   |
| Kaneko                                                         | 4/9     | 13/83    |
| Pilgrim                                                        | 12/37   | 48/219   |

**Table S12: Characteristics of previously published meta analyses on the predictors of PPM implantation**

| Author                               | Year | S  | PPM risk factors                                                                                                                                                                   | Comparison arms                                  | Model            | Results                                                                                                                                              |
|--------------------------------------|------|----|------------------------------------------------------------------------------------------------------------------------------------------------------------------------------------|--------------------------------------------------|------------------|------------------------------------------------------------------------------------------------------------------------------------------------------|
| <b>Erkagic</b>                       | 2011 | 32 | Bradycardia, bifascicular block, RBBB                                                                                                                                              | CVP VS ESP                                       | Random and Fixed | Higher risk of PPM in CVP, with prior RBBB                                                                                                           |
| <b>Gozdek</b>                        | 2020 | 11 | Lotus valve                                                                                                                                                                        | Lotus Vs Sapiens 3                               | Random           | Higher risk of PPM with Lotus                                                                                                                        |
| <b>Zhan</b>                          | 2019 | 5  | Access (transfemoral vs transaxial)                                                                                                                                                | Transfemoral vs Transaxial                       | Random           | No difference in PPM implantation with different access                                                                                              |
| <b>Zafar</b>                         | 2020 | 4  | Chest radiation in patients with thoracic malignancy                                                                                                                               | Hx of chest radiation vs no chest radiation      | Random           | No difference in PPM implantation in patients who received chest radiation                                                                           |
| <b>Xi</b>                            | 2019 | 20 | Long term outcomes of TAVR and Self expandable prosthesis                                                                                                                          | Self expandable vs balloon expandable prosthesis | Random and Fixed | Self expandable prosthesis had 2.5 fold increased risk of PPM implantation compared to balloon expandable prosthesis                                 |
| <b>Siontis</b>                       | 2014 | 41 | Age, sex, Afib, LBBB, RBBB,preserved EF, access route, first degree AV block, left anterior and posterior hemiblock, intraprocedural AV Block, medtronic vs edwards valve, PR >200 | Predictors of pacemaker                          | Random           | Male sex, intraprocedural AV block, baseline conduction abnormalities predicted PPM implantation                                                     |
| <b>Shoar</b>                         | 2020 | 3  | Preexisting LBBB                                                                                                                                                                   | TAVR in patients with LBBB vs no LBBB            | Random           | LBBB has an increased risk of PPM after TAVR                                                                                                         |
| <b>Biondi</b>                        | 2014 | 4  | Valve type (TAVR vs. SAVR risk factors)                                                                                                                                            | CoreValve vs Sapien                              | Fixed            | Higher PPM risk in CoreValve                                                                                                                         |
| <b>Alperi</b>                        | 2020 | 35 | Implantation depth, different types of valves and pre TAVR balloon aortic valvuloplasty                                                                                            | sapien3 vs Evolur vs accurate neo vs portico     | -                | Pre-TAVR BAV has no impact. Sapien 3 and Acurate Neo valves had lowest risk for PPM. Deeper valve implantation and a shorter MS length has high risk |
| <b>An lee</b>                        | 2020 | 27 | SEV, BEV                                                                                                                                                                           | SEV vs BEV in post TAVR                          | Random           | Transcatheter aortic VIV, SEV was associated with larger postprocedural effective orifice area but higher rates of PPM.                              |
| <b>Ando</b>                          | 2016 | 7  | RBBB, self-expandable prosthesis valve, and depth of implantation                                                                                                                  | NO-LBBB vs Non NO LBBB (NO=New onset)            | Random           | LBBB after TAVI was associated with an increased rate of PPM                                                                                         |
| <b>Faroux</b>                        | 2020 | 30 | New onset persistent (NOP)-LBBB                                                                                                                                                    | NOP-LBBB                                         | Random and Fixed | NOP-LBBB had increased risk of all-cause death and PPM at 1-year follow-up.                                                                          |
| <b>Fu</b>                            | 2019 | 15 | PPM in TAVR                                                                                                                                                                        | PPM in SAVR                                      | Random           | PPM implantation rate for TAVR is higher than SAVR at 1-year                                                                                         |
| <b>Gozdek (duplicate, same as 3)</b> | 2020 | 11 | Lotus valve                                                                                                                                                                        | Sapien 3                                         | Random           | Lotus was associated with higher rate of PPM implantation                                                                                            |
| <b>Haddad</b>                        | 2019 | 12 | Core Valve                                                                                                                                                                         | Jena Valve                                       | Random           | Early gen. Valve associated with increased PPM compared to new gen valves for TAVI in AR                                                             |
| <b>Kanjanahatta kij</b>              | 2018 | 9  | Bicuspid aortic valve (BAV) TAVR                                                                                                                                                   | Tricuspid valve TAVR                             | Random           | No difference in pacemaker implantation, major bleeding, and major vascular complication                                                             |
| <b>Khan</b>                          | 2017 | 12 | TAVR                                                                                                                                                                               | SAVR                                             | Random           | High PPM and paravalvular leaks in TAVR.                                                                                                             |

|                    |      |    |                                                                                                                                                                              |                                                                                |                  |                                                                                                                                                    |
|--------------------|------|----|------------------------------------------------------------------------------------------------------------------------------------------------------------------------------|--------------------------------------------------------------------------------|------------------|----------------------------------------------------------------------------------------------------------------------------------------------------|
| <b>Khan</b>        | 2020 | 7  | TAVR                                                                                                                                                                         | SAVR                                                                           | Random           | High risk of PPM in TAVR                                                                                                                           |
| <b>Khatri</b>      | 2021 | 49 | CoreValve, Transarterial route                                                                                                                                               | CoreValve vs Edwards Sapien valve                                              | Random           | PPI was 5 times more common with the CoreValve than the Sapien valve                                                                               |
| <b>Lee</b>         | 2020 | 31 | Transaxillary route                                                                                                                                                          | Transaxillary vs direct aortic approach                                        | Random           | Direct aortic TAVR was associated with lower risks of permanent pacemaker implantation and valve malposition than transaxillary TAVR               |
| <b>Li</b>          | 2020 | 13 | TAVR                                                                                                                                                                         | SAVR                                                                           | Random           | No difference in PPM between TAVR and SAVR                                                                                                         |
| <b>Lou</b>         | 2020 | 21 | TAVR                                                                                                                                                                         | TAVR vs SAVR                                                                   | Random           | TAVR had high complication, paravalvular leak, and PPM                                                                                             |
| <b>Krasopolous</b> | 2016 | 8  | CoreValve                                                                                                                                                                    | Transfemoral Edwards Sapiens vs Transapical Edwards Sapiens vs CoreValve       | Random           | CoreValve implantation was associated with an increased risk of PPM                                                                                |
| <b>Liu</b>         | 2018 | 3  | TAVR                                                                                                                                                                         | SAVR and Medical therapy                                                       | Fixed            | No differences in the risk of PPM, myocardial infarction, acute kidney injury or endocarditis                                                      |
| <b>Liu</b>         | 2020 | 5  | Nonagenarians                                                                                                                                                                | Younger patients                                                               | Random and Fixed | Nonagenarians had higher complications but no difference in PPM risk                                                                               |
| <b>Wagner</b>      | 2019 | 19 | TAVR                                                                                                                                                                         | TAVR vs SAVR, BAV, and medical therapy                                         | Random and Fixed | TAVR had lower risk of PPM compared to SAVR                                                                                                        |
| <b>Wang</b>        | 2020 | 6  | TAVR                                                                                                                                                                         | SUAVR (sutureless aortic valve replacement)                                    | Random and Fixed | No significant difference in need for PPM                                                                                                          |
| <b>Williams</b>    | 2020 | 4  | Sutureless and rapid-deployment aortic valve replacement (SURD-AVR)                                                                                                          | Edwards Intuity (Edwards Lifesciences, California) valves                      | Random           | PPM insertion rate was 8.2%.                                                                                                                       |
| <b>Xie</b>         | 2016 | 17 | BAV pts with TAVR                                                                                                                                                            | non-BAV                                                                        | Random and Fixed | No difference in the risk of PPM                                                                                                                   |
| <b>Seimens</b>     | 2016 | 4  | Trans-arterial vs surgical approach                                                                                                                                          | TAVR vs SAVR                                                                   | Random ized      | TAVI had lower risk of PPM                                                                                                                         |
| <b>Rosendael</b>   | 2018 | 40 | Pre-procedural conduction abnormalities including RBBB, prolonged PR interval, Atrial fibrillation and first degree AV block; LVOT calcification amount; Implantation depth. | Preprocedural anatomical and conduction abnormalities, present vs not present. | Random and Fixed | Electrical factor, calcification of the left ventricular outflow tract, balloon valvuloplasty and depth of implantation had increased risk of PPI. |
| <b>Regueiro</b>    | 2016 | 17 | Pre-procedural conduction abnormalities. New onset LBBB post-TAVR                                                                                                            | Edward Sapiens vs Medtronic valve.                                             | Fixed            | New-onset LBBB had higher PPM risk                                                                                                                 |
| <b>R Khan</b>      | 2020 | 7  | Undergoing TAVR. Moderate vs low surgical risk                                                                                                                               | TAVR vs SAVR.                                                                  | Random ized      | High PPM in TAVR                                                                                                                                   |
| <b>Quintana</b>    | 2019 | 5  | BAV                                                                                                                                                                          | TAV                                                                            | Fixed            | No difference of PPM in BAV and TAV                                                                                                                |
| <b>Panchal</b>     | 2015 | 27 | Valve type used for TAVR                                                                                                                                                     | Edwards vs Medtronic Corevalve                                                 | Random and Fixed | PPM higher in Corevalve compared to EV                                                                                                             |

|                 |      |    |                             |                                                   |                  |                                                         |
|-----------------|------|----|-----------------------------|---------------------------------------------------|------------------|---------------------------------------------------------|
| <b>Nagaraja</b> | 2014 | 39 | TAVR                        | TAVR vs SAVR                                      | Random and Fixed | No difference in risk of PPM in TAVR and SAVR           |
| <b>Malik</b>    | 2020 | 4  | TAVR                        | TAVR vs SAVR                                      | Random           | High risk of PPM in TAVR                                |
| <b>Ma</b>       | 2020 | 7  | Chronic liver disease (CLD) | No CLD                                            | Fixed            | CLD has lower PPM risk                                  |
| <b>M Gozdek</b> | 2020 | 6  | Valve type used for TAVR    | Self expandable valve vs Balloon-expandable Valve | Random and Fixed | Lower risk of PPM in Accurate neo self expandable valve |
| <b>Arora</b>    | 2016 | 29 | TAVR                        | SAVR                                              | Random           | Increase risk of PPM in TAVR.                           |
| <b>Croix</b>    | 2020 | 11 | RBBB                        | TAVR in No RBBB                                   | Fixed            | RBBB had higher incidence of PPM & mortality at 30 days |

**SUPPLEMENTAL FOREST PLOTS FOR ALL STUDIES:**

**Figure S1: Forest Plot showing an individual and pooled OR of PPM Implantation in patients age>80**

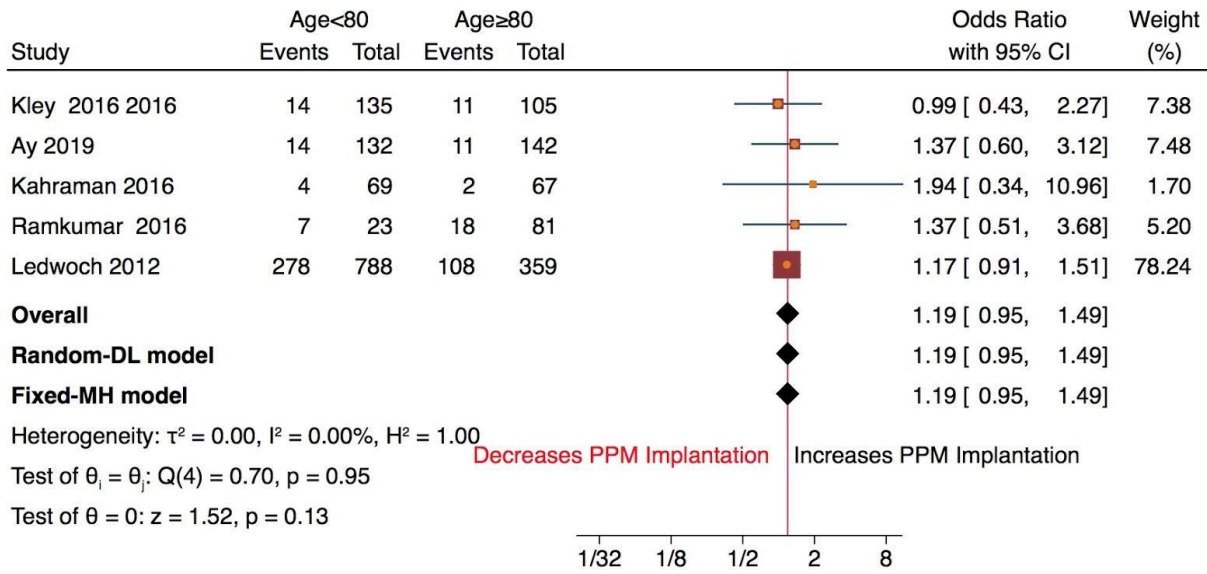

**Figure S2: Forest Plot showing an individual and pooled OR of PPM Implantation in Male Patients**



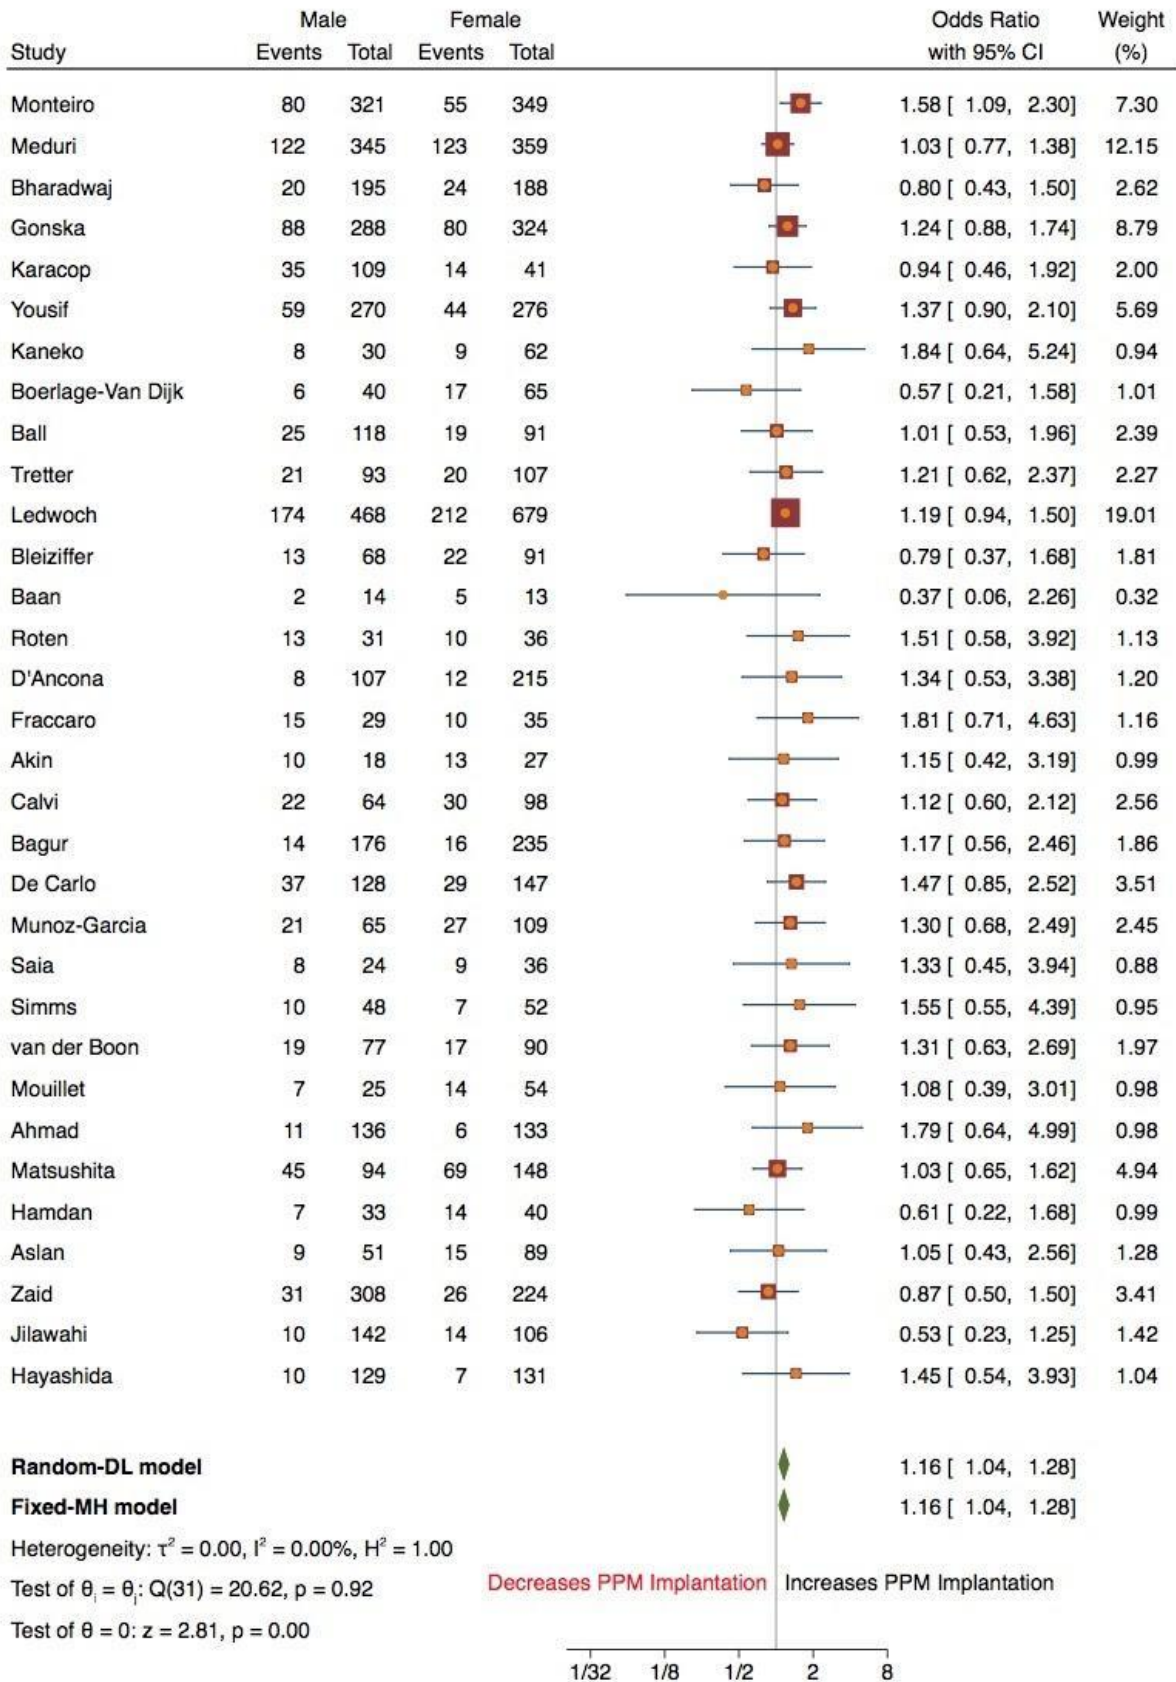

**Figure S3: Forest Plot showing an individual and pooled OR of PPM Implantation with First Degree Heart Block**

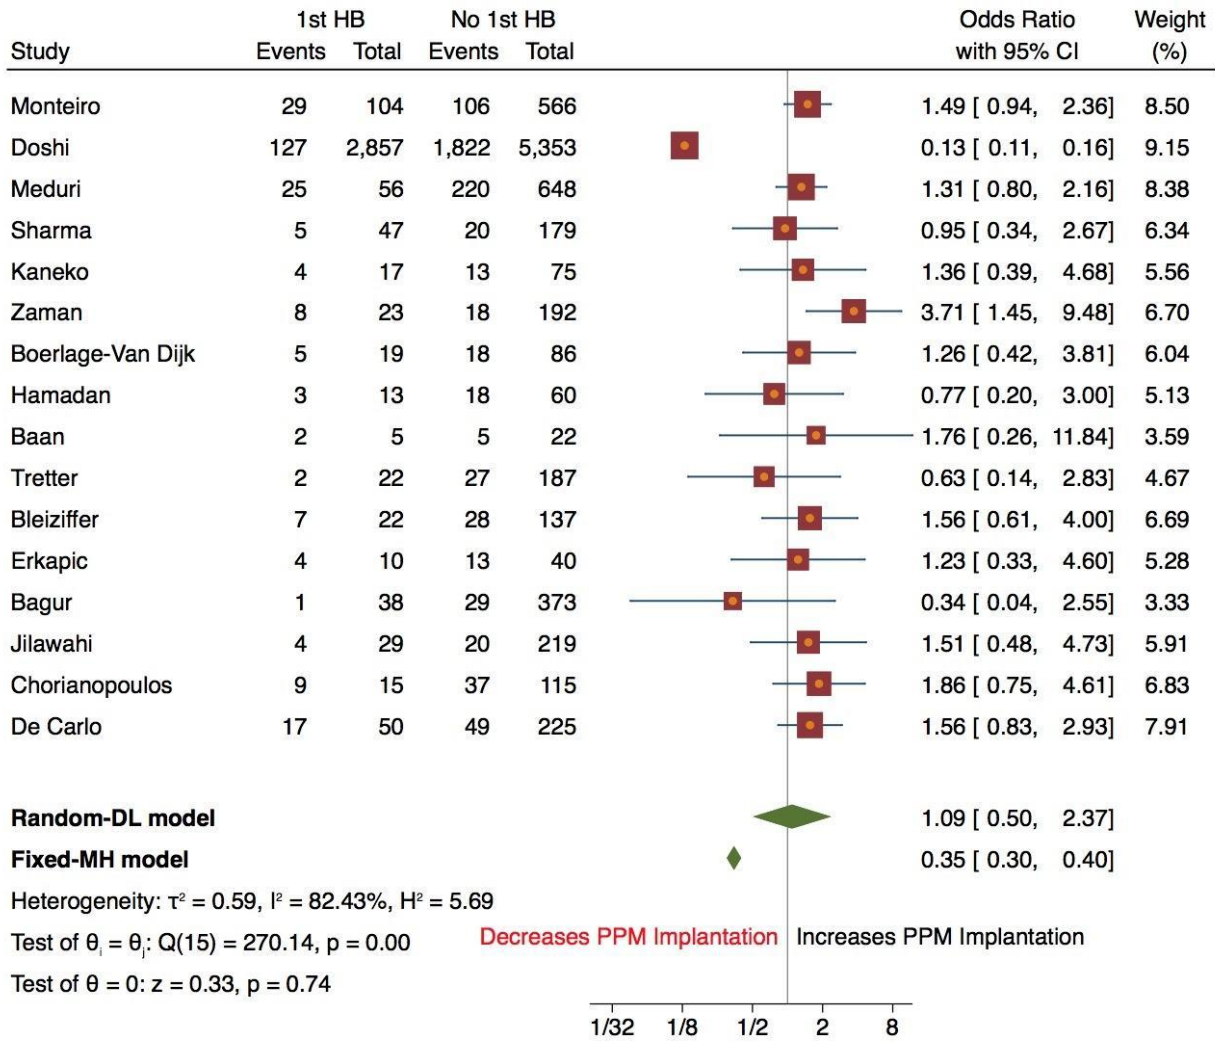

**Figure S4: Forest Plot showing an individual and pooled OR of PPM Implantation with Mobitz type 1 2nd Degree Heart Block**

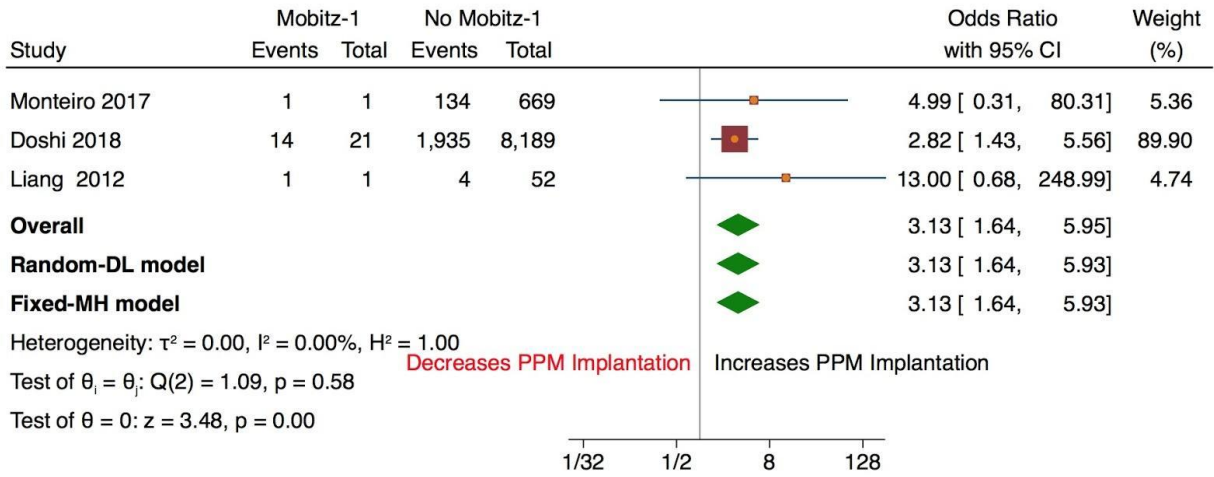

**Figure S5: Forest Plot showing an individual and pooled OR of PPM Implantation with Atrial Fibrillation**

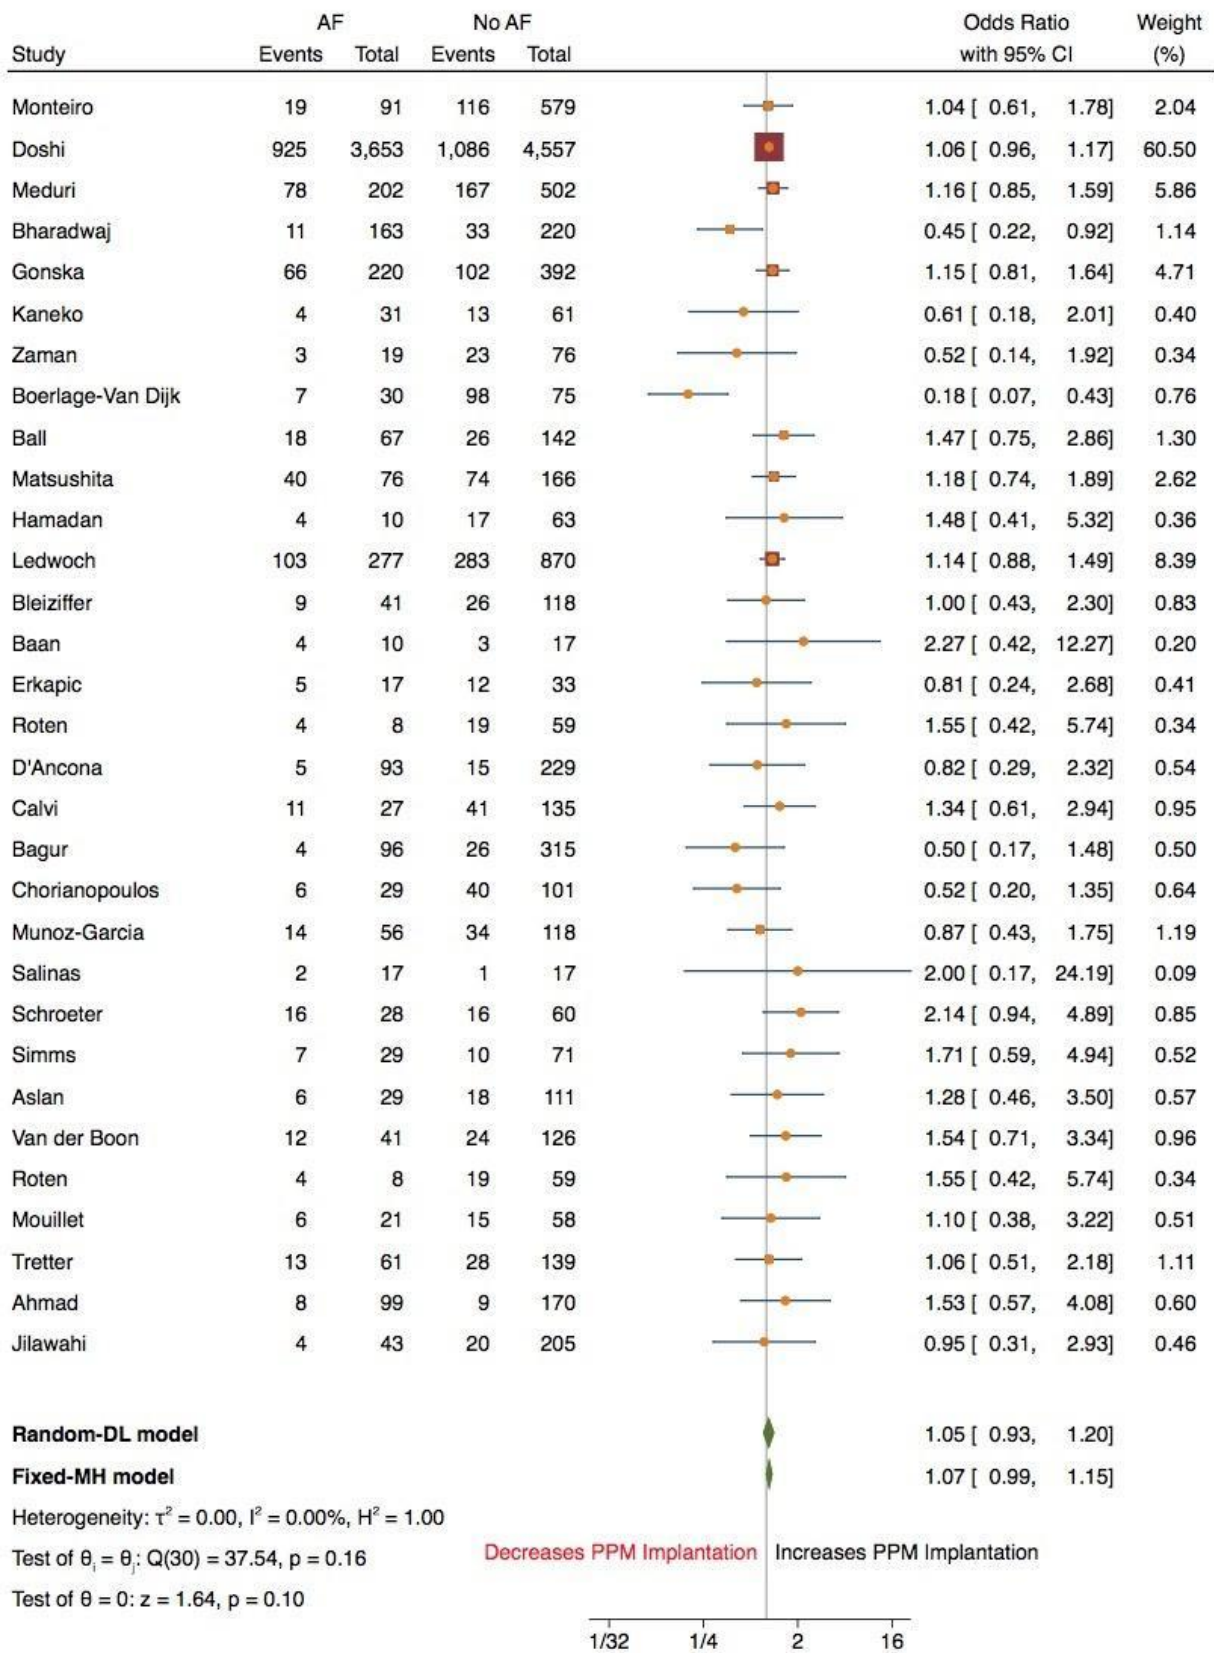

**Figure S6: Forest Plot showing an individual and pooled OR of PPM Implantation with Left Anterior Fascicular Block (LAFB)**

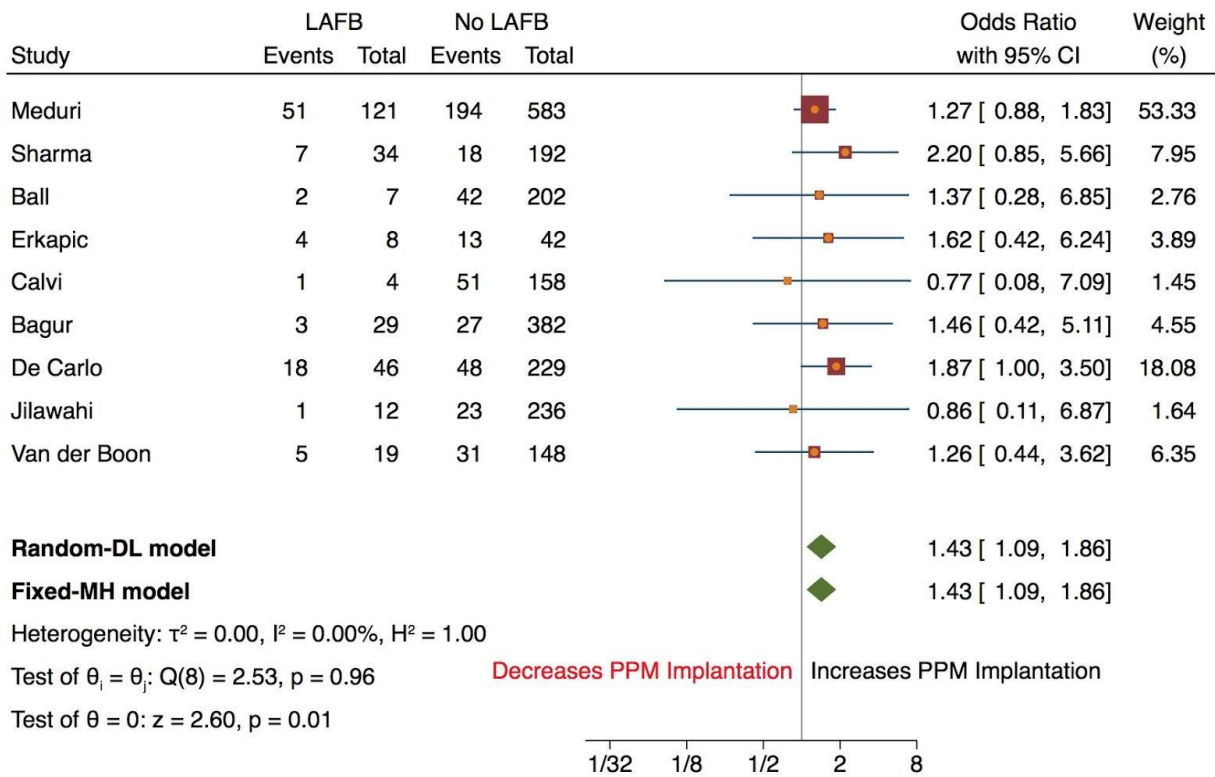

**Figure S7: Forest Plot showing an individual and pooled OR of PPM Implantation with Left Posterior Fascicular Block (LPFB)**

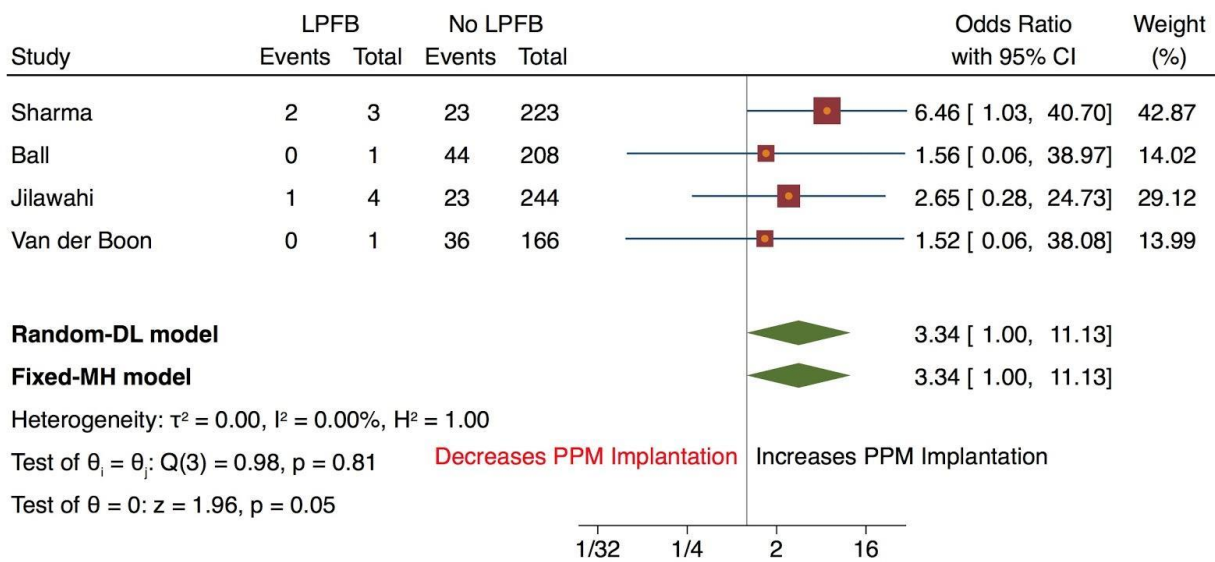

**Figure S8: Forest Plot showing an individual and pooled OR of PPM Implantation with Intra-procedural AV Block**

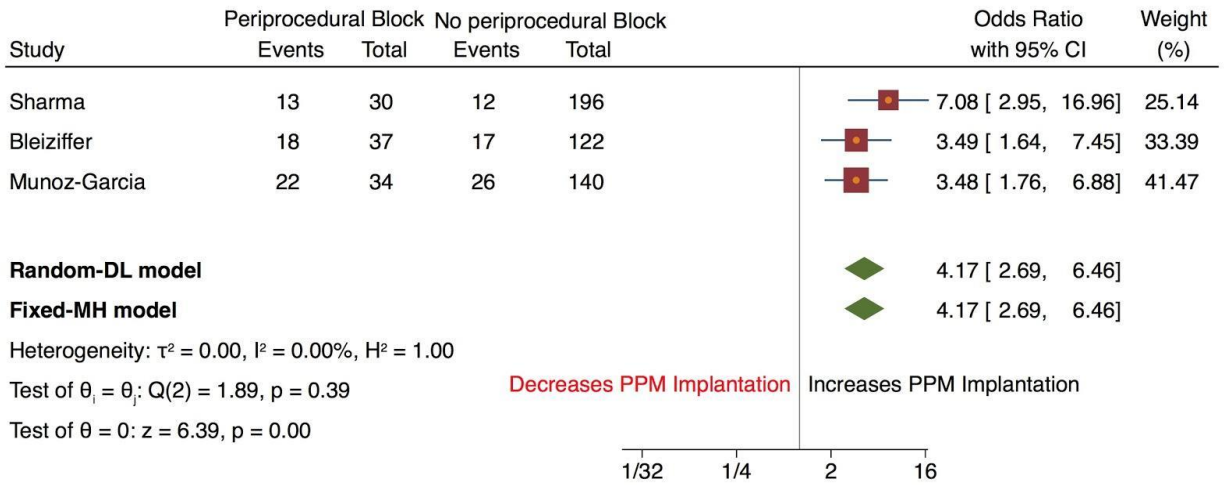

**Figure S9: Forest Plot showing an individual and pooled OR of PPM Implantation with Left Bundle Branch block.**

| Study             | LBBB   |       | No LBBB |       | Odds Ratio<br>with 95% CI | Weight<br>(%) |
|-------------------|--------|-------|---------|-------|---------------------------|---------------|
|                   | Events | Total | Events  | Total |                           |               |
| Monteiro          | 15     | 93    | 120     | 577   | 0.78 [ 0.43, 1.38]        | 8.90          |
| Doshi             | 260    | 731   | 1,751   | 7,479 | 1.52 [ 1.31, 1.77]        | 19.40         |
| Meduri            | 20     | 56    | 225     | 648   | 1.03 [ 0.60, 1.75]        | 9.78          |
| Bharadwaj         | 3      | 39    | 41      | 344   | 0.65 [ 0.19, 2.18]        | 2.98          |
| Hamandi           | 13     | 52    | 97      | 372   | 0.96 [ 0.50, 1.83]        | 7.78          |
| Sharma            | 1      | 23    | 24      | 203   | 0.37 [ 0.05, 2.85]        | 1.16          |
| Kaneko            | 0      | 7     | 17      | 92    | 0.35 [ 0.02, 6.46]        | 0.59          |
| Zaman             | 1      | 8     | 26      | 87    | 0.42 [ 0.05, 3.50]        | 1.08          |
| Boerlage-Van Dijk | 1      | 14    | 22      | 91    | 0.30 [ 0.04, 2.37]        | 1.13          |
| Ball              | 28     | 100   | 16      | 109   | 1.91 [ 0.97, 3.73]        | 7.42          |
| Sawaya            | 0      | 14    | 43      | 230   | 0.18 [ 0.01, 3.12]        | 0.62          |
| Hamadan           | 1      | 9     | 12      | 72    | 0.67 [ 0.08, 5.75]        | 1.05          |
| Roten             | 1      | 11    | 22      | 56    | 0.23 [ 0.03, 1.90]        | 1.10          |
| Bleiziffer        | 7      | 27    | 28      | 132   | 1.22 [ 0.48, 3.09]        | 4.68          |
| Eltchnainoff      | 4      | 27    | 25      | 182   | 1.08 [ 0.35, 3.34]        | 3.39          |
| Baan              | 0      | 2     | 7       | 25    | 0.68 [ 0.03, 15.77]       | 0.51          |
| Erkapic           | 0      | 5     | 17      | 45    | 0.24 [ 0.01, 4.50]        | 0.58          |
| Haworth           | 1      | 3     | 7       | 27    | 1.29 [ 0.12, 14.33]       | 0.85          |
| Roten             | 1      | 11    | 22      | 56    | 0.23 [ 0.03, 1.90]        | 1.10          |
| Khawaja           | 14     | 32    | 67      | 211   | 1.38 [ 0.69, 2.73]        | 7.23          |
| Calvi             | 2      | 5     | 50      | 157   | 1.26 [ 0.24, 6.67]        | 1.70          |
| Bagur             | 1      | 33    | 29      | 378   | 0.39 [ 0.05, 2.99]        | 1.19          |
| Chorianopoulos    | 3      | 9     | 43      | 121   | 0.94 [ 0.24, 3.63]        | 2.49          |
| De Carlo          | 9      | 37    | 57      | 238   | 1.02 [ 0.46, 2.22]        | 6.01          |
| Saia              | 1      | 9     | 16      | 51    | 0.35 [ 0.04, 3.01]        | 1.07          |
| Schroeter         | 2      | 7     | 30      | 81    | 0.77 [ 0.15, 3.92]        | 1.78          |
| Jilawahi          | 0      | 14    | 24      | 234   | 0.33 [ 0.02, 5.70]        | 0.62          |
| Tretter           | 1      | 14    | 40      | 186   | 0.33 [ 0.04, 2.60]        | 1.15          |
| Van der Boon      | 3      | 14    | 33      | 153   | 0.99 [ 0.27, 3.65]        | 2.66          |

**Random-DL model**

1.06 [ 0.87, 1.29]

**Fixed-MH model**

1.29 [ 1.14, 1.46]

Heterogeneity:  $\tau^2 = 0.06$ ,  $I^2 = 23.92\%$ ,  $H^2 = 1.31$

Test of  $\theta = \theta_0$ :  $Q(28) = 31.99$ ,  $p = 0.27$

Test of  $\theta = 0$ :  $z = -0.10$ ,  $p = 0.92$

Decreases PPM Implantation      Increases PPM Implantation

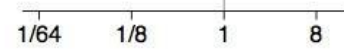



Figure S10: Forest Plot showing an individual and pooled OR of PPM Implantation with RBBB

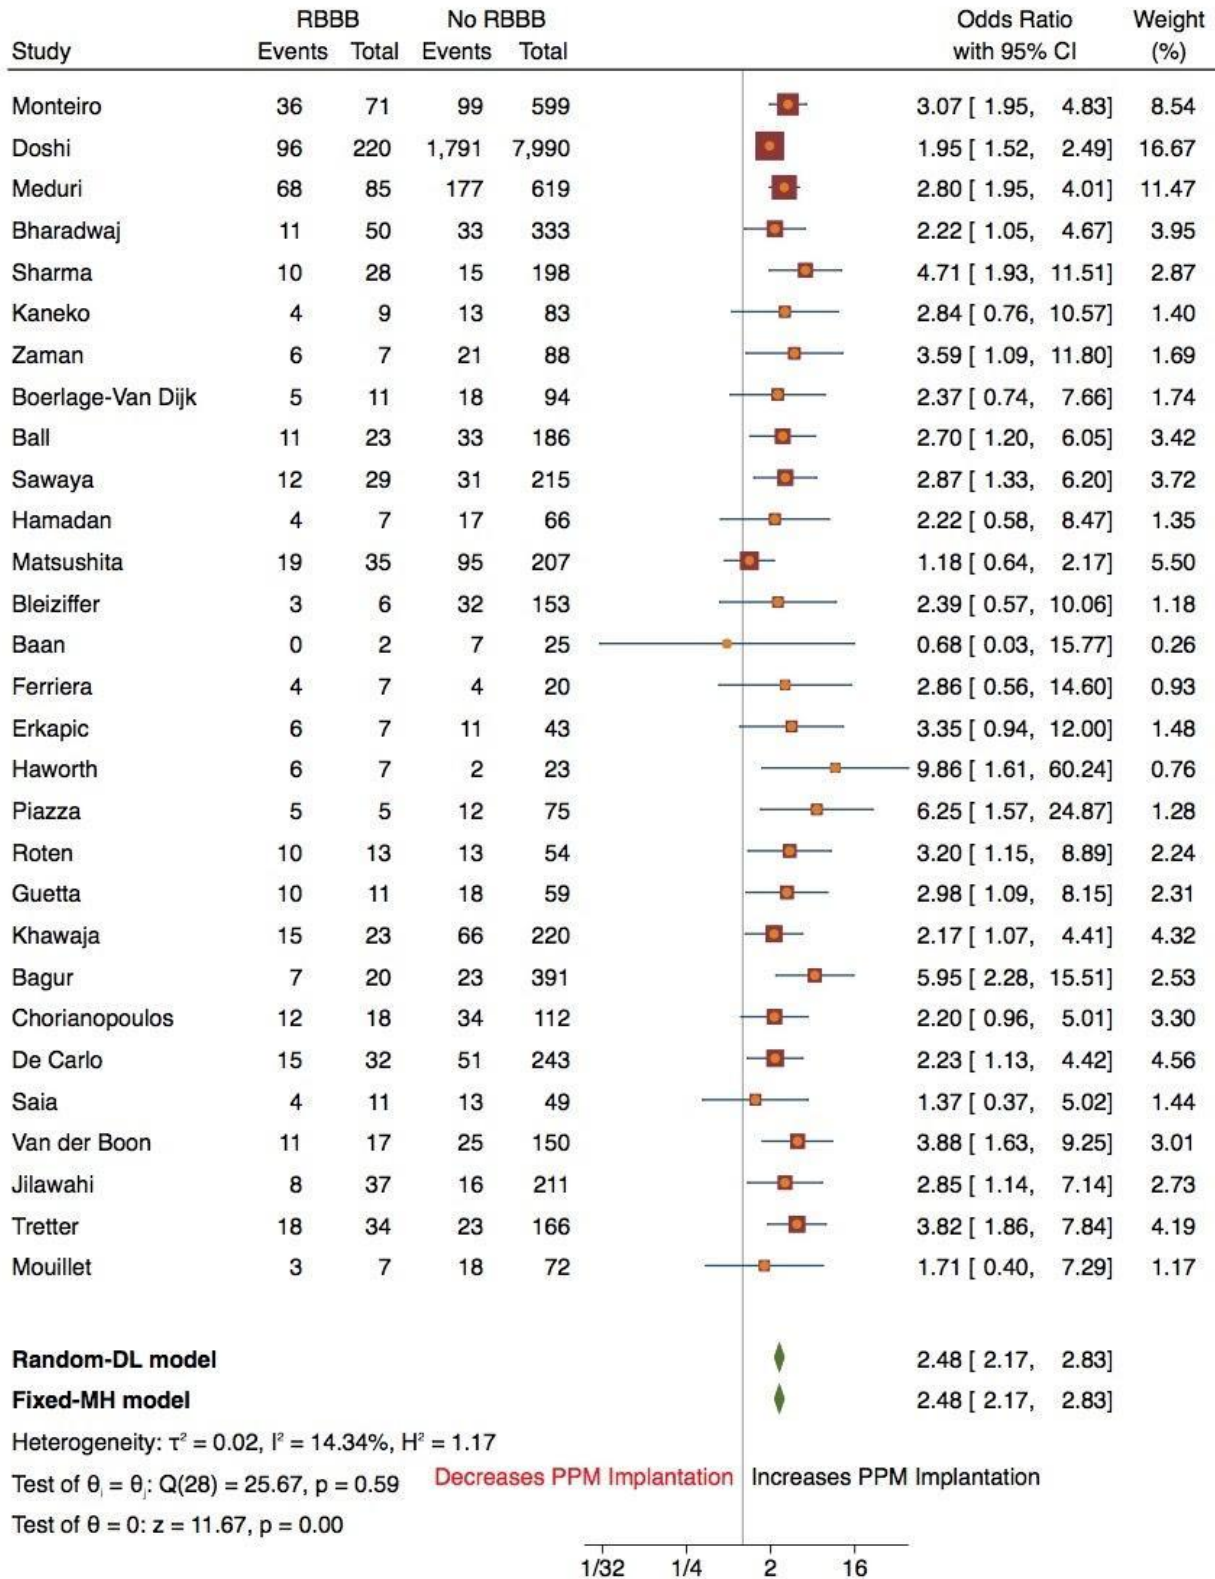

**Figure S11: Forest Plot showing an individual and pooled OR of PPM Implantation with Bifascicular Block**

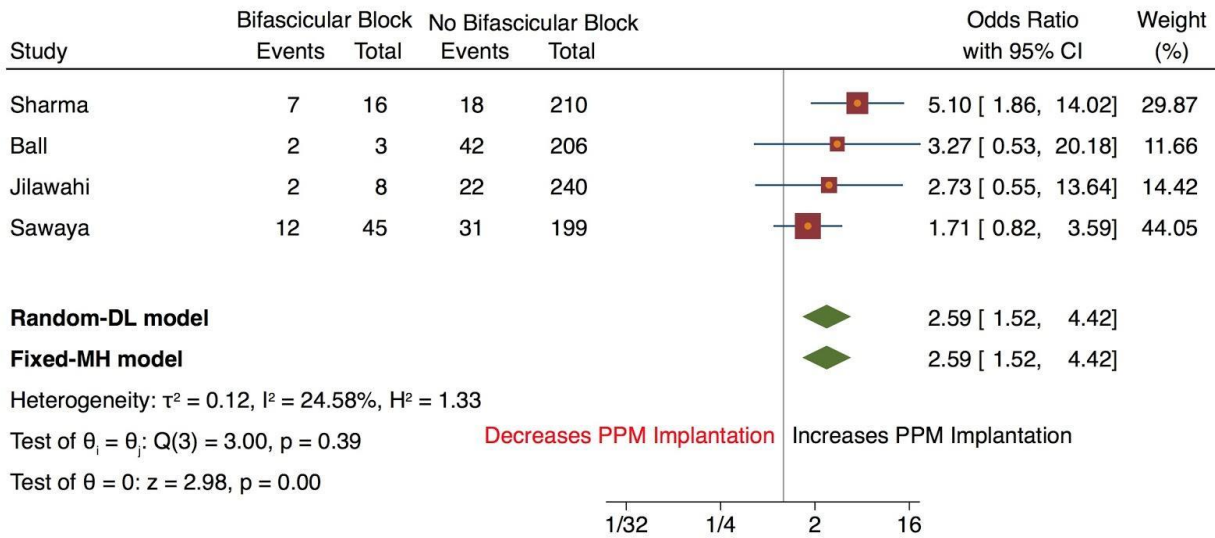

**Figure S12: Forest Plot showing an individual and pooled OR of PPM Implantation in Heart Failure**

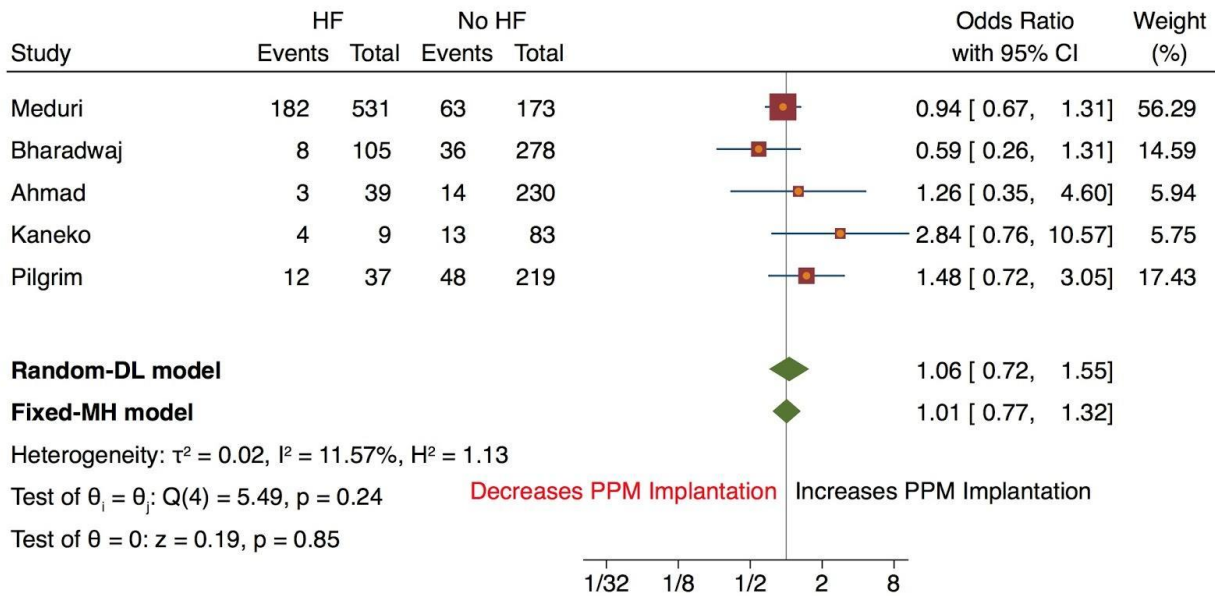

**Figure S13: Forest Plot showing an individual and pooled OR of PPM Implantation in Heart Failure with Preserved Ejection Fraction.**

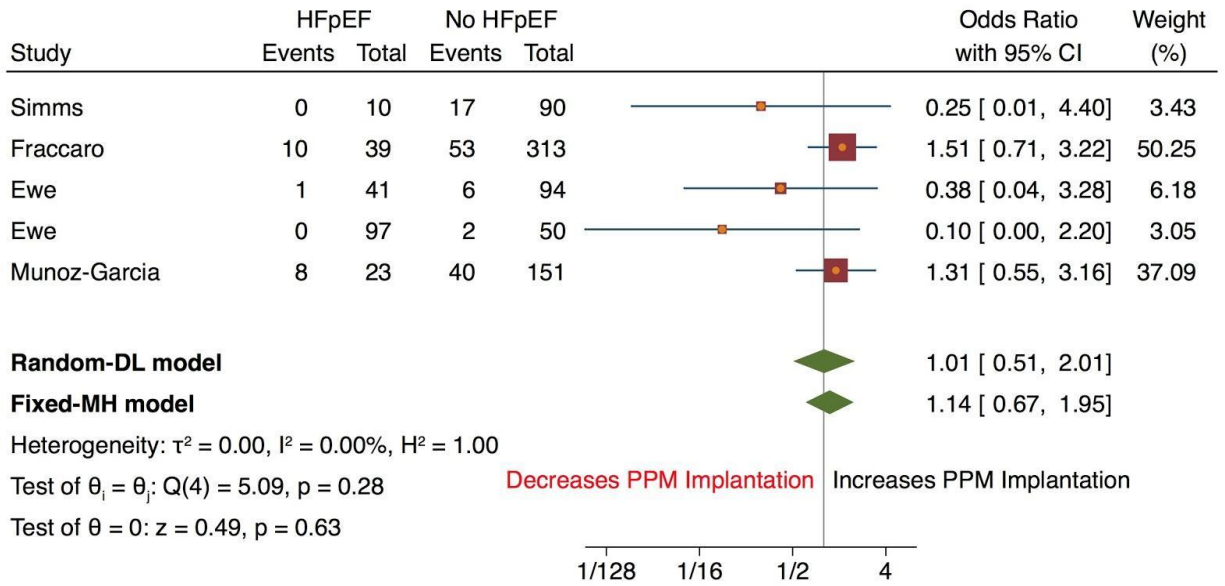

Random-effects REML model

**Figure S14: Forest Plot showing an individual and pooled OR of PPM Implantation comparing Transfemoral approach with Transapical Approach**

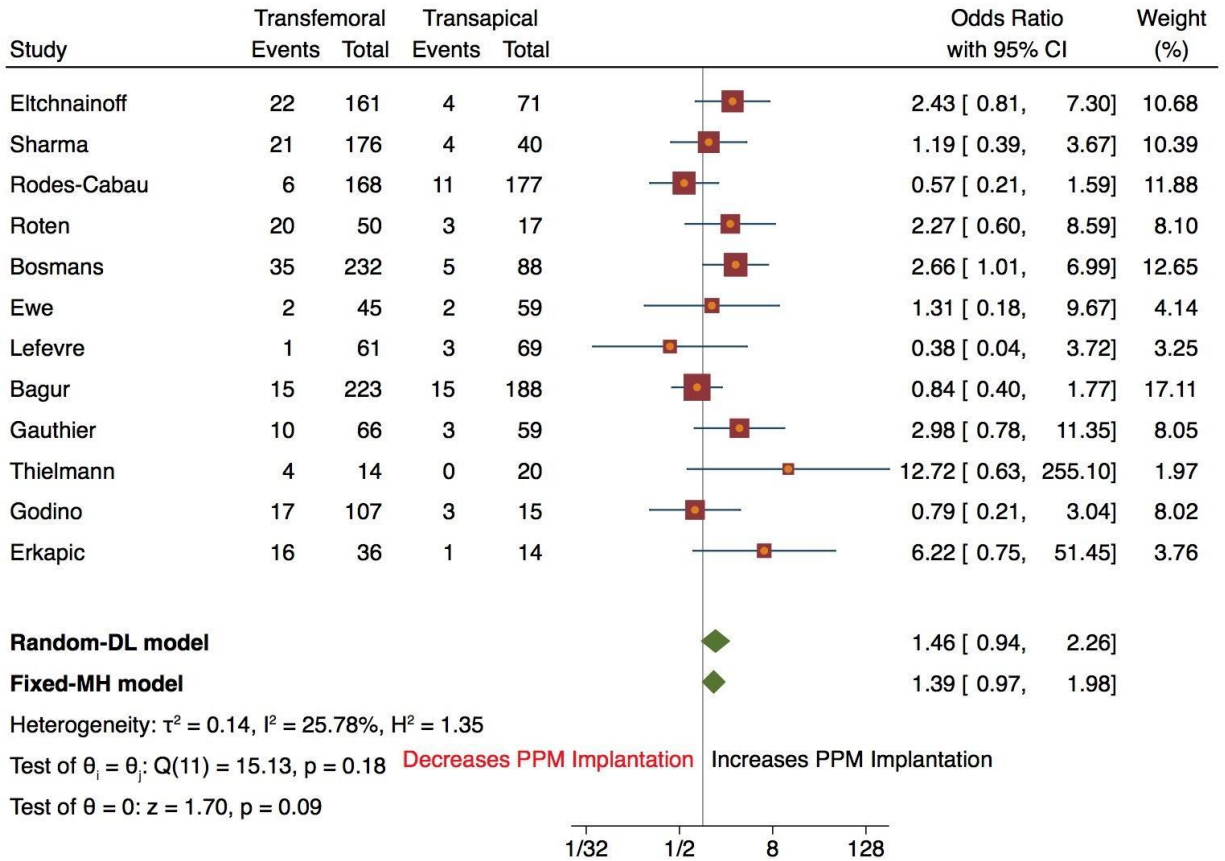

**Figure S16: Forest Plot showing an individual and pooled OR of PPM Implantation comparing Transfemoral approach with subclavian approach**

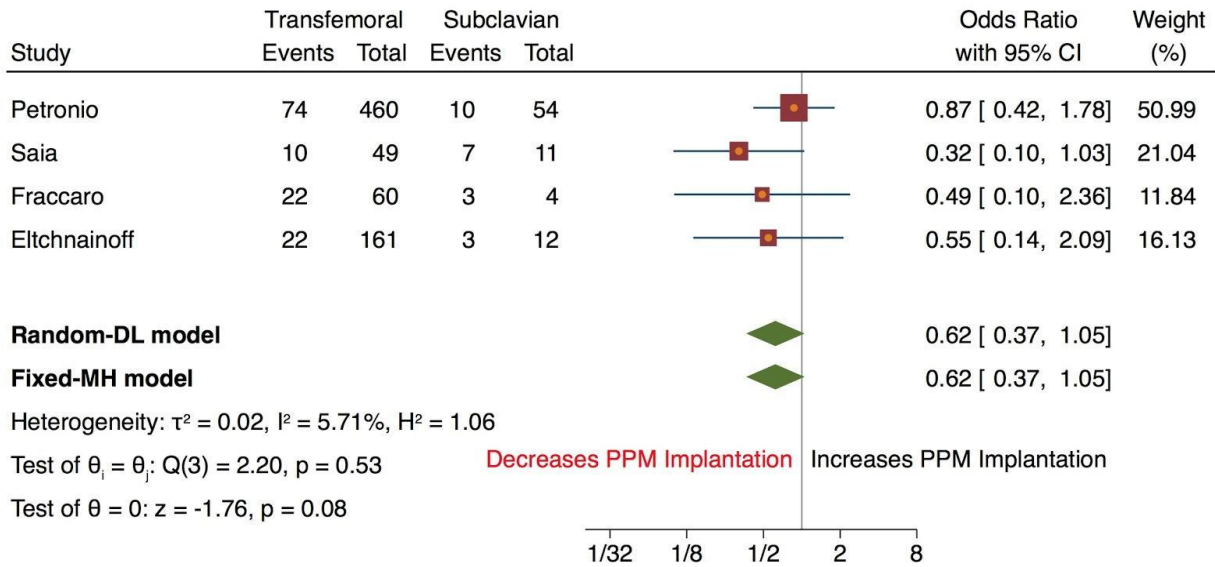

**Figure S17: Forest plot showing the mean difference of implantation depth for patients with and without PPM**

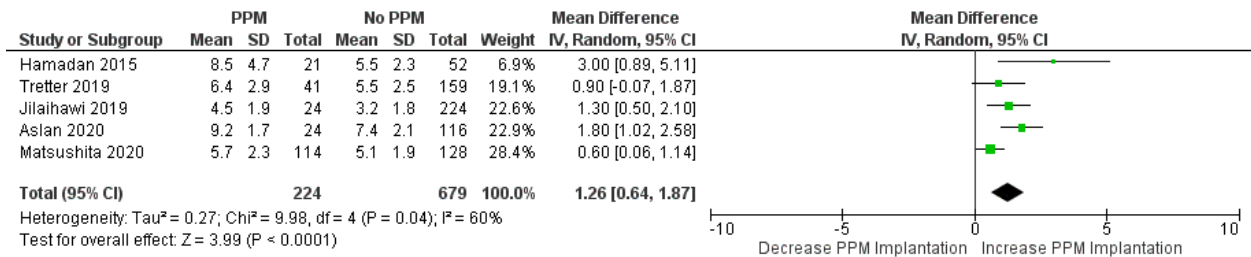

**Figure S18: Forest plot showing the pooled mean membranous septal length for patients with and without PPM**

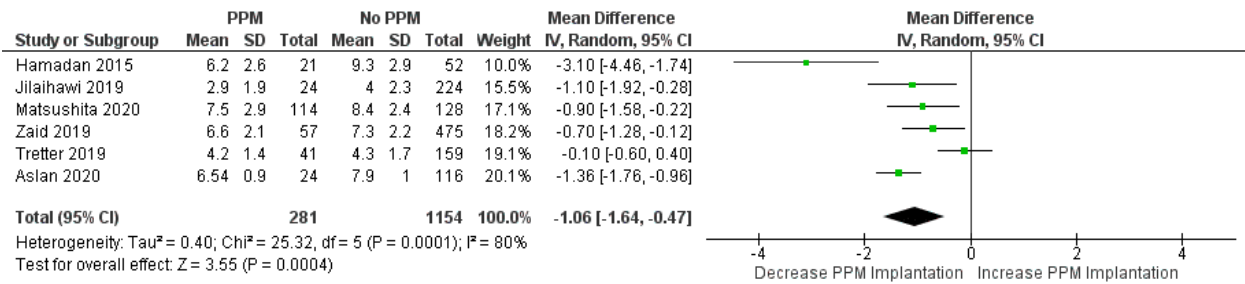

**Figure S19: Forest Plot showing an individual and pooled OR of PPM Implantation comparing Medtronic CoreValve with Edwards SAPIEN valve**

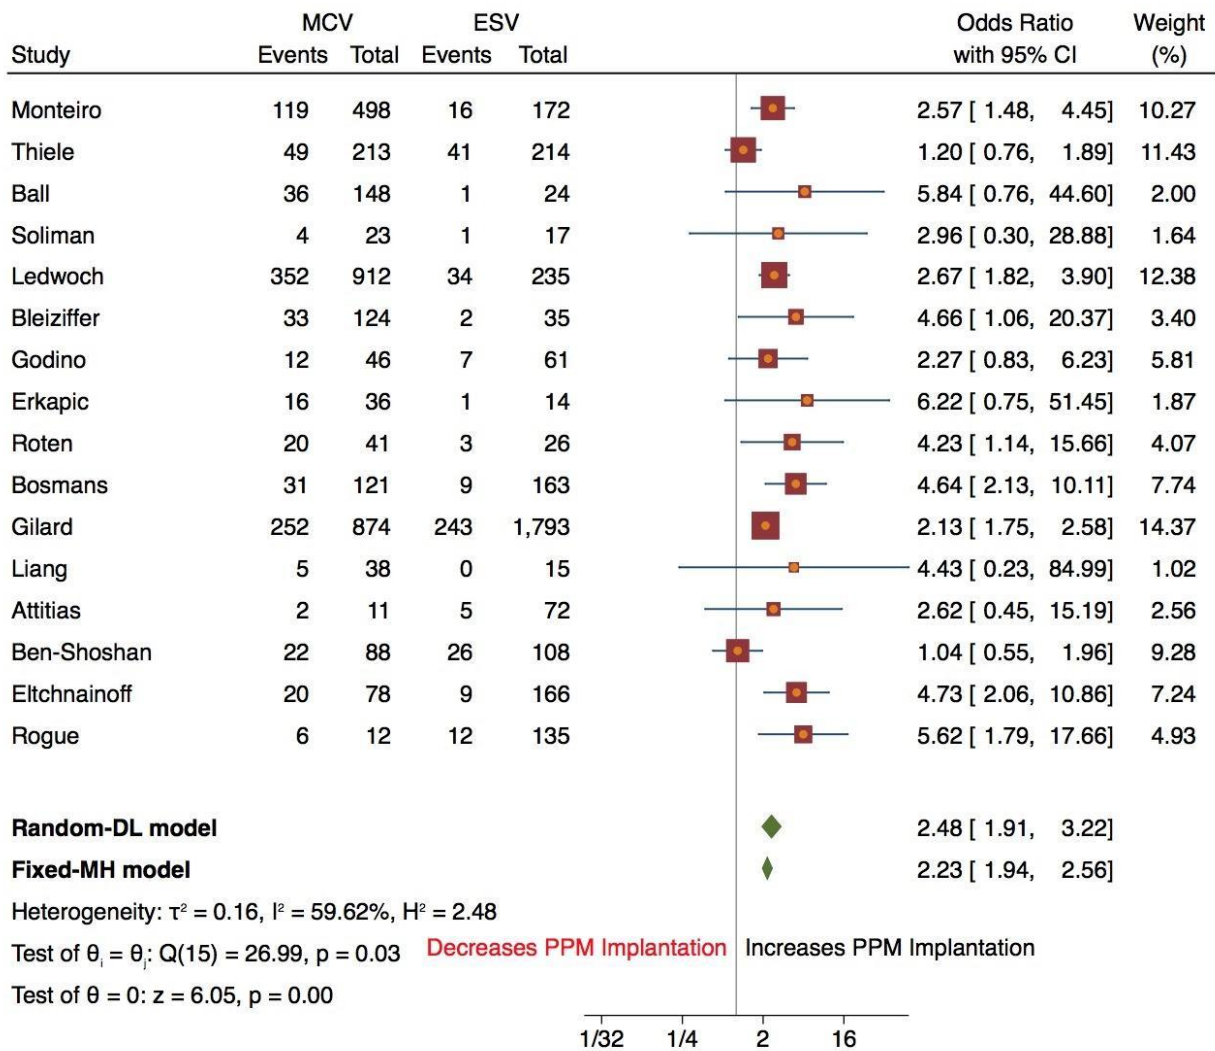

**Figure S20: Forest Plot showing an individual and pooled OR of PPM Implantation comparing LOTUS valve with Medtronic CoreValve**

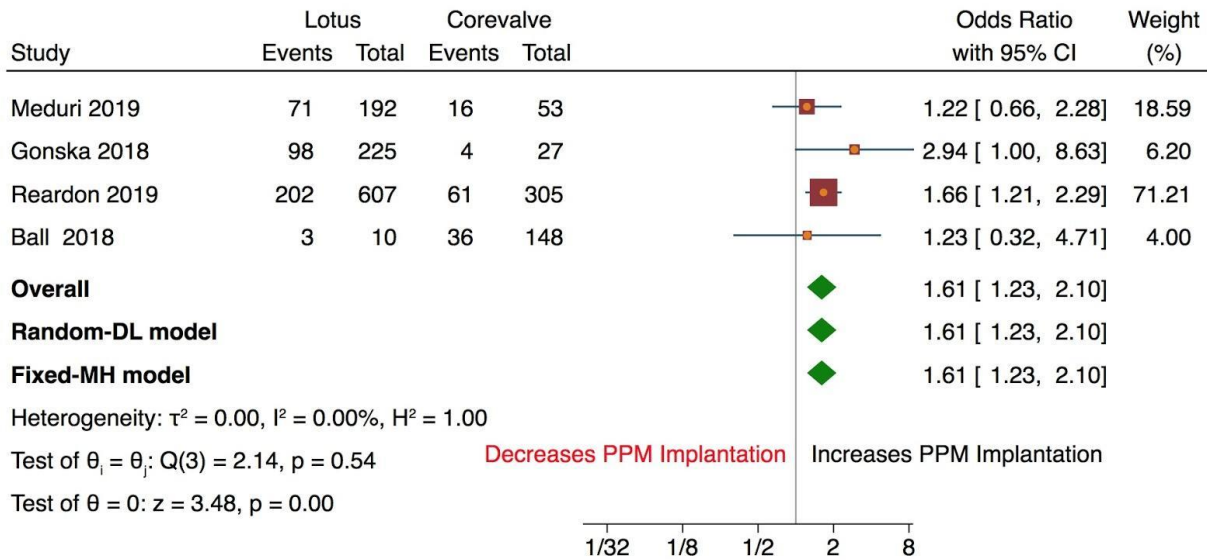

**Figure S21: Forest Plot showing an individual and pooled OR of PPM Implantation comparing Edwards SAPIEN valve with Medtronic EvolutR valve**

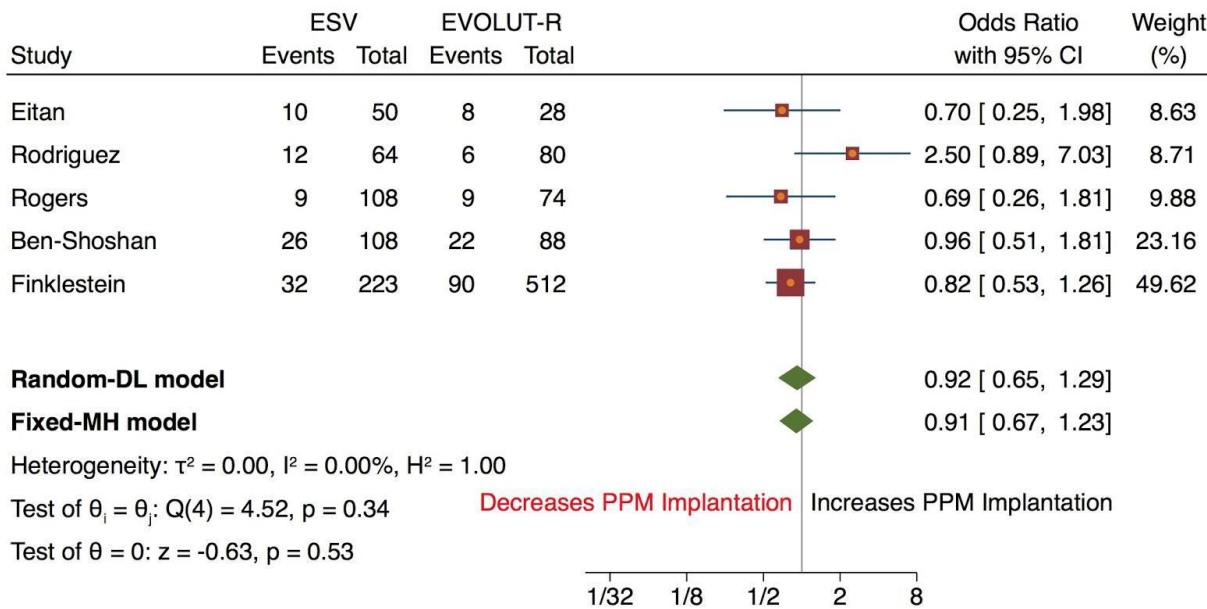

**Figure S22: Sensitivity Analysis on the pooled estimate of PPM implantation in patients with First Degree HB.**

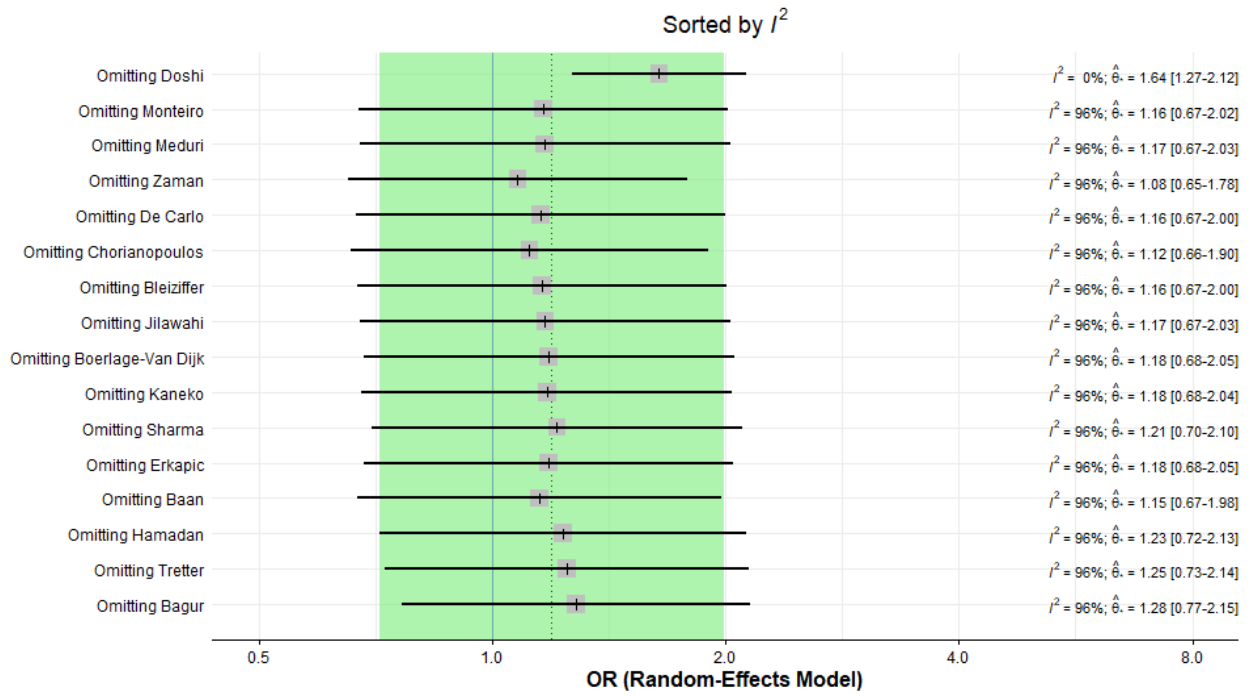



**Figure S23: Sensitivity Analysis on the pooled estimate of PPM implantation in patients with RBBB.**

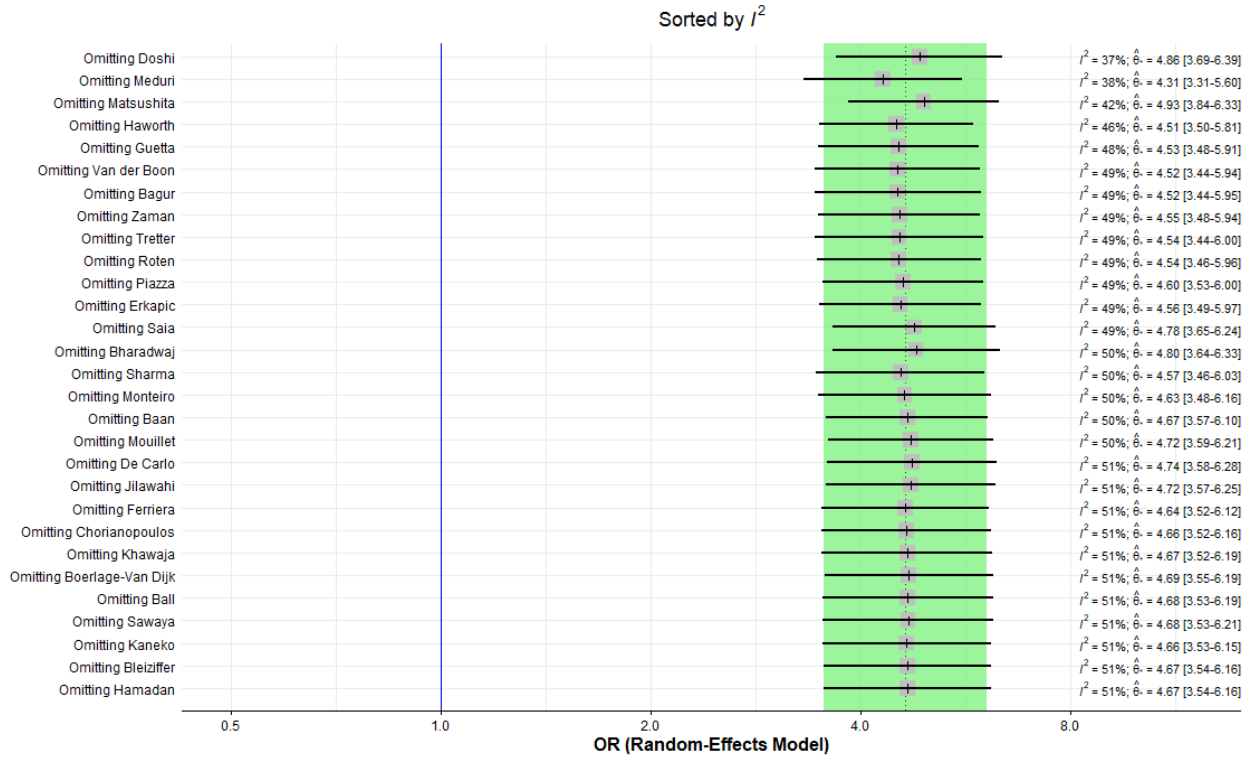

Figure S24: Sensitivity Analysis on the pooled estimate of PPM implantation in patients with LBBB.

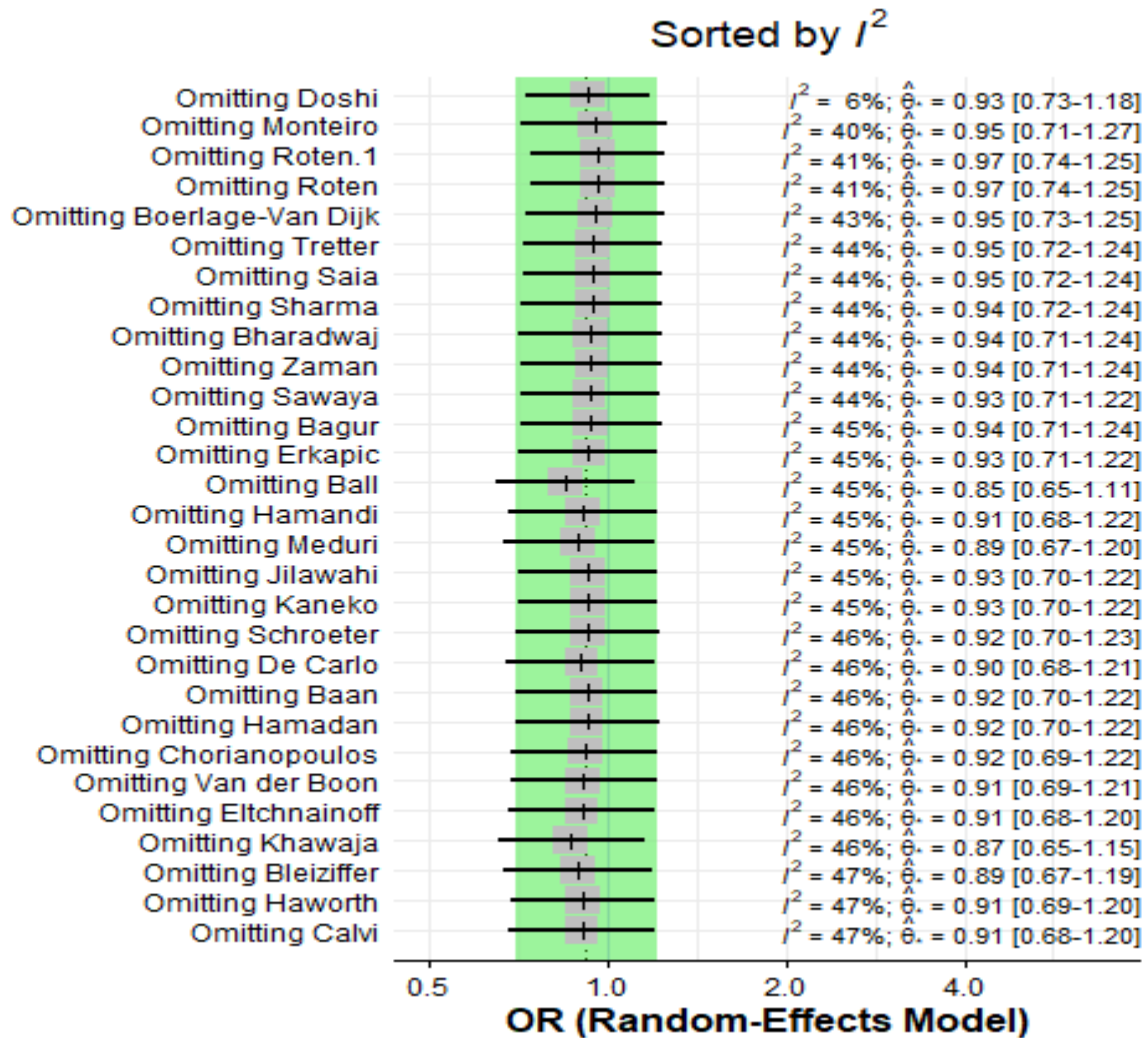

Figure S25: Funnel plot showing minimal publication bias comparing the pooled estimate of PPM predictor across studies for sex.

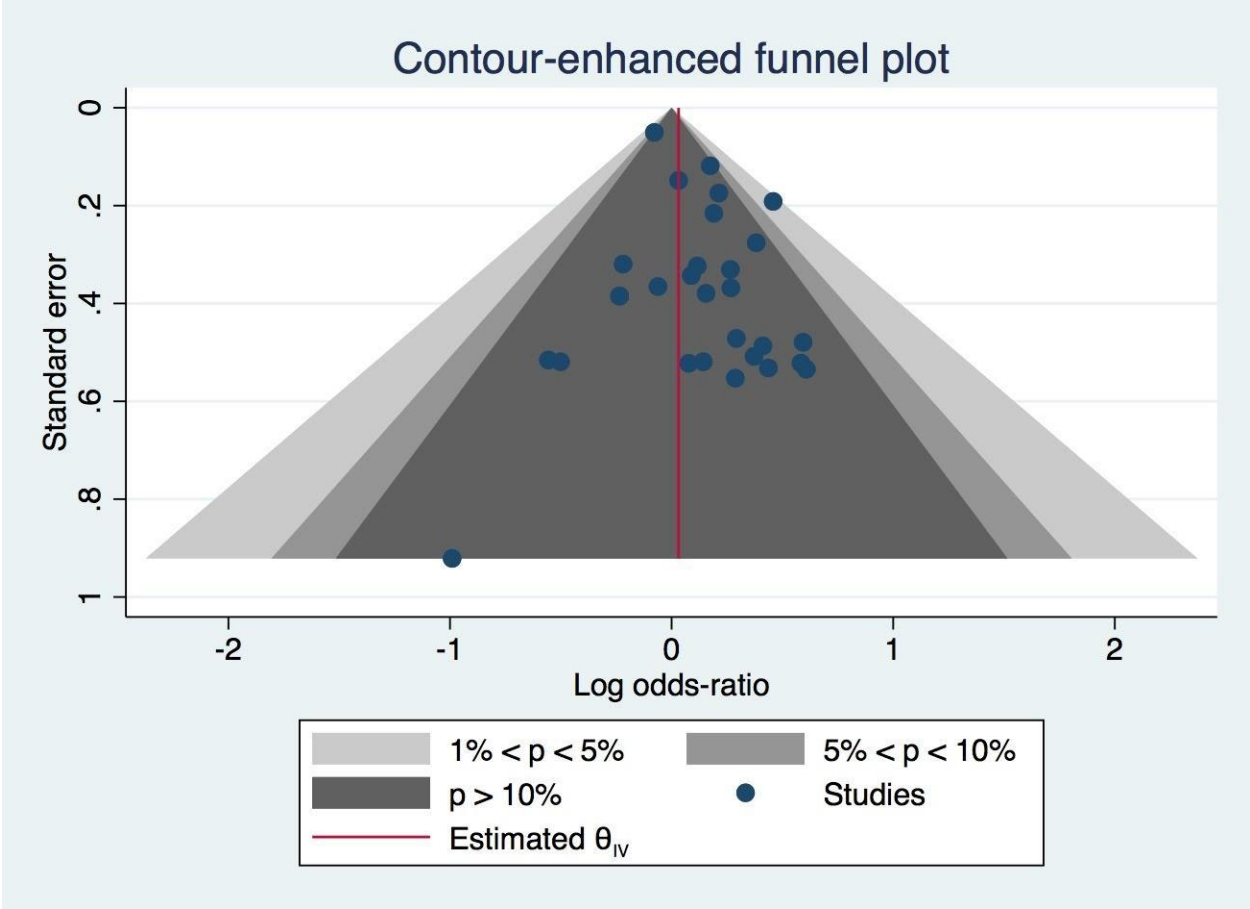

Supplement: JAH3-10-e020906-s001.pdf [file JAH3-10-e020906-s001.pdf]
